# Supplementary material for: New prenylxanthones, polyketide hemiterpenoid pigments from the endophytic fungus Emericella sp. XL029 and their anti-agricultural pathogenic fungal and antibacterial activities
Source: Royal Society of Chemistry journal article supplement (doi:10.1039/c7ra04762b), 2017-01-01
Supplement: c7ra04762b1.pdf [file c7ra04762b1.pdf]

## Electronic Supplementary Information (ESI)

### **New prenylxanthonenes, polyketide hemiterpenoid pigments from the endophytic fungus *Emericella* sp. XL029 and their anti-agricultural pathogenic fungal and antibacterial activities**

Xia Wu,<sup>a</sup> Li-Zhen Fang,<sup>c</sup> Feng-Lou Liu,<sup>d</sup> Xue-Jiao Pang,<sup>a</sup> Hai-Li Qin,<sup>a</sup> Ting Zhao,<sup>a</sup> Lu-Lin Xu,<sup>a</sup>  
Deng-Feng Yang<sup>\*b</sup> and Xiao-Long Yang<sup>\*a</sup>

<sup>a</sup>*Innovative Drug Research Centre (IDRC), School of Pharmaceutical Sciences, Chongqing University (Huxi Campus), Chongqing 401331, P. R. China.*

<sup>b</sup>*State Key Laboratory of Enzyme Technology, National Engineering Research Centre of Non-food Biorefinery, Guangxi Academy of Sciences, Nanning 530007, P. R. China.*

<sup>c</sup>*School of Pharmacy, Xinxiang Medical University, Xinxiang 453003, P. R. China*

<sup>d</sup>*School of Agriculture, Ningxia University, Yinchuan 750021, P. R. China;*

\* To whom correspondence should be addressed. E-mail: yxl19830915@163.com; dengfengyang@163.com

## List of ESI

|                                                                                                        |    |
|--------------------------------------------------------------------------------------------------------|----|
| <b>Figure S1.</b> <sup>1</sup> H NMR spectrum of <b>1</b> (CDCl <sub>3</sub> , 400 MHz) .....          | 4  |
| <b>Figure S2.</b> <sup>13</sup> C NMR spectrum of <b>1</b> (CDCl <sub>3</sub> , 100 MHz) .....         | 4  |
| <b>Figure S3.</b> <sup>1</sup> H, <sup>1</sup> H COSY spectrum of <b>1</b> (CDCl <sub>3</sub> ) .....  | 5  |
| <b>Figure S4.</b> HMQC spectrum of <b>1</b> (CDCl <sub>3</sub> ) .....                                 | 5  |
| <b>Figure S5.</b> HMBC spectrum of <b>1</b> (CDCl <sub>3</sub> ) .....                                 | 6  |
| <b>Figure S6.</b> NOESY spectrum of <b>1</b> (CDCl <sub>3</sub> ) .....                                | 6  |
| <b>Figure S7.</b> HRESIMS spectrum of <b>1</b> .....                                                   | 7  |
| <b>Figure S8.</b> IR spectrum of <b>1</b> .....                                                        | 7  |
| <b>Figure S9.</b> UV spectrum of <b>1</b> .....                                                        | 7  |
| <b>Figure S10.</b> <sup>1</sup> H NMR spectrum of <b>2</b> (CDCl <sub>3</sub> , 400 MHz) .....         | 8  |
| <b>Figure S11.</b> <sup>13</sup> C NMR spectrum of <b>2</b> (CDCl <sub>3</sub> , 100 MHz) .....        | 8  |
| <b>Figure S12.</b> <sup>1</sup> H, <sup>1</sup> H COSY spectrum of <b>2</b> (CDCl <sub>3</sub> ) ..... | 9  |
| <b>Figure S13.</b> HMQC spectrum of <b>2</b> (CDCl <sub>3</sub> ) .....                                | 9  |
| <b>Figure S14.</b> HMBC spectrum of <b>2</b> (CDCl <sub>3</sub> ) .....                                | 10 |
| <b>Figure S15.</b> NOESY spectrum of <b>2</b><br>(CDCl <sub>3</sub> ).....                             | 10 |
| <b>Figure S16.</b> HRESIMS spectrum of <b>2</b> .....                                                  | 11 |
| <b>Figure S17.</b> IR spectrum of <b>2</b> .....                                                       | 11 |
| <b>Figure S18.</b> UV spectrum of <b>2</b> .....                                                       | 12 |
| <b>Figure S19.</b> <sup>1</sup> H NMR spectrum of <b>3</b> (CDCl <sub>3</sub> , 400 MHz) .....         | 12 |
| <b>Figure S20.</b> <sup>13</sup> C NMR spectrum of <b>3</b> (CDCl <sub>3</sub> , 100 MHz) .....        | 13 |
| <b>Figure S21.</b> <sup>1</sup> H, <sup>1</sup> H COSY spectrum of <b>3</b> (CDCl <sub>3</sub> ) ..... | 13 |
| <b>Figure S22.</b> HMQC spectrum of <b>3</b> (CDCl <sub>3</sub> ) .....                                | 14 |
| <b>Figure S23.</b> HMBC spectrum of <b>3</b> (CDCl <sub>3</sub> ) .....                                | 14 |
| <b>Figure S24.</b> NOESY spectrum of <b>3</b> (CDCl <sub>3</sub> )<br>.....                            | 15 |
| <b>Figure S25.</b> HRESIMS spectrum of <b>3</b> .....                                                  | 15 |
| <b>Figure S26.</b> IR spectrum of <b>3</b> .....                                                       | 16 |
| <b>Figure S27.</b> UV spectrum of <b>3</b> .....                                                       | 16 |
| <b>Figure S28.</b> <sup>1</sup> H NMR spectrum of <b>4</b> (CDCl <sub>3</sub> , 400 MHz) .....         | 17 |
| <b>Figure S29.</b> <sup>13</sup> C NMR spectrum of <b>4</b> (CDCl <sub>3</sub> , 100 MHz) .....        | 17 |
| <b>Figure S30.</b> <sup>1</sup> H, <sup>1</sup> H COSY spectrum of <b>4</b> (CDCl <sub>3</sub> ) ..... | 18 |
| <b>Figure S31.</b> HMQC spectrum of <b>4</b> (CDCl <sub>3</sub> ) .....                                | 18 |
| <b>Figure S32.</b> HMBC spectrum of <b>4</b> (CDCl <sub>3</sub> ) .....                                | 19 |
| <b>Figure S33.</b> NOESY spectrum of <b>4</b> (CDCl <sub>3</sub> )<br>.....                            | 19 |
| <b>Figure S34.</b> HRESIMS spectrum of <b>4</b> .....                                                  | 20 |
| <b>Figure S35.</b> IR spectrum of <b>4</b> .....                                                       | 20 |
| <b>Figure S36.</b> UV spectrum of <b>4</b><br>.....                                                    | 20 |
| <b>Table S1.</b> X-ray crystallographic data of <b>4</b> .....                                         | 21 |
| <b>Figure S37.</b> <sup>1</sup> H NMR spectrum of <b>5</b> (CDCl <sub>3</sub> , 400 MHz) .....         | 22 |

|                                                                                                         |    |
|---------------------------------------------------------------------------------------------------------|----|
| <b>Figure S38.</b> $^{13}\text{C}$ NMR spectrum of <b>5</b> ( $\text{CDCl}_3$ , 100 MHz) .....          | 22 |
| <b>Figure S39.</b> $^1\text{H}$ NMR spectrum of <b>6</b> ( $\text{CDCl}_3$ , 400 MHz) .....             | 23 |
| <b>Figure S40.</b> $^{13}\text{C}$ NMR spectrum of <b>6</b> ( $\text{CDCl}_3$ , 100 MHz) .....          | 23 |
| <b>Figure S41.</b> $^1\text{H}$ NMR spectrum of <b>7</b> ( $\text{CDCl}_3$ , 400 MHz) .....             | 24 |
| <b>Figure S42.</b> $^{13}\text{C}$ NMR spectrum of <b>7</b> ( $\text{CDCl}_3$ , 100 MHz) .....          | 24 |
| <b>Figure S43.</b> $^1\text{H}$ NMR spectrum of <b>8</b> ( $\text{CDCl}_3$ , 400 MHz) .....             | 25 |
| <b>Figure S44.</b> $^{13}\text{C}$ NMR spectrum of <b>8</b> ( $\text{CDCl}_3$ , 100 MHz) .....          | 25 |
| <b>Figure S45.</b> $^1\text{H}$ NMR spectrum of <b>9</b> ( $\text{CD}_3\text{OD}_3$ , 400 MHz) .....    | 26 |
| <b>Figure S46.</b> $^{13}\text{C}$ NMR spectrum of <b>9</b> ( $\text{CD}_3\text{OD}_3$ , 400 MHz) ..... | 26 |

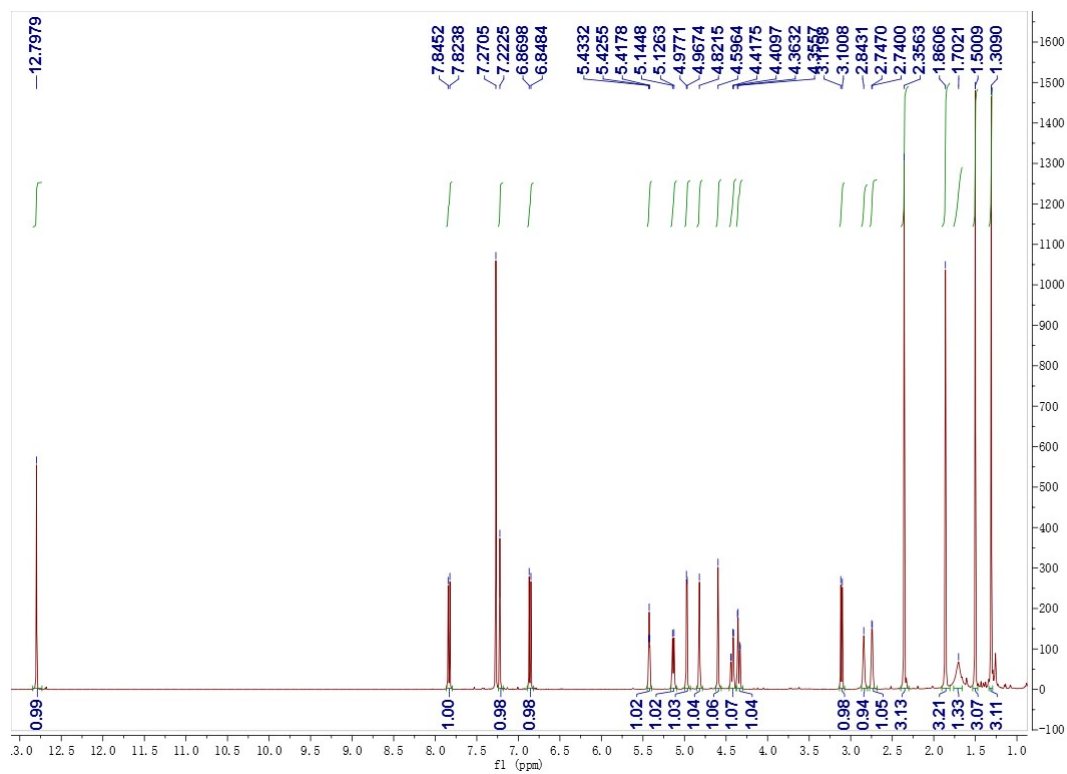

Figure S1.  $^1\text{H}$  NMR spectrum of **1** ( $\text{CDCl}_3$ , 400 MHz)

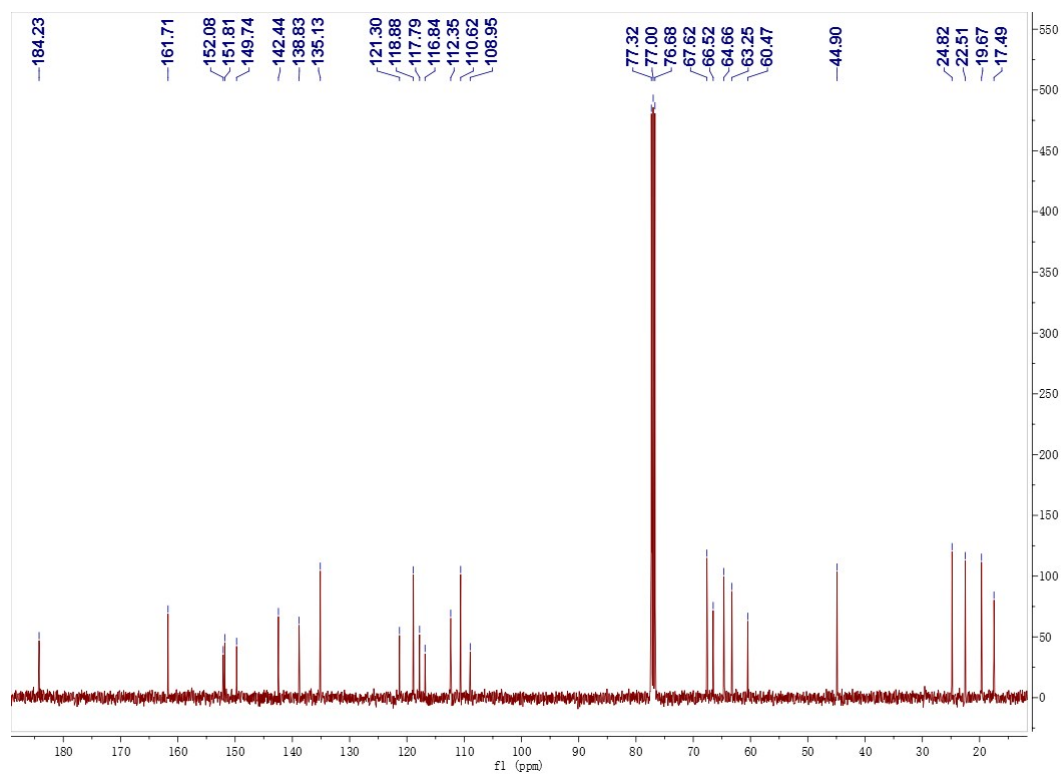

Figure S2.  $^{13}\text{C}$  NMR spectrum of **1** ( $\text{CDCl}_3$ , 100 MHz)

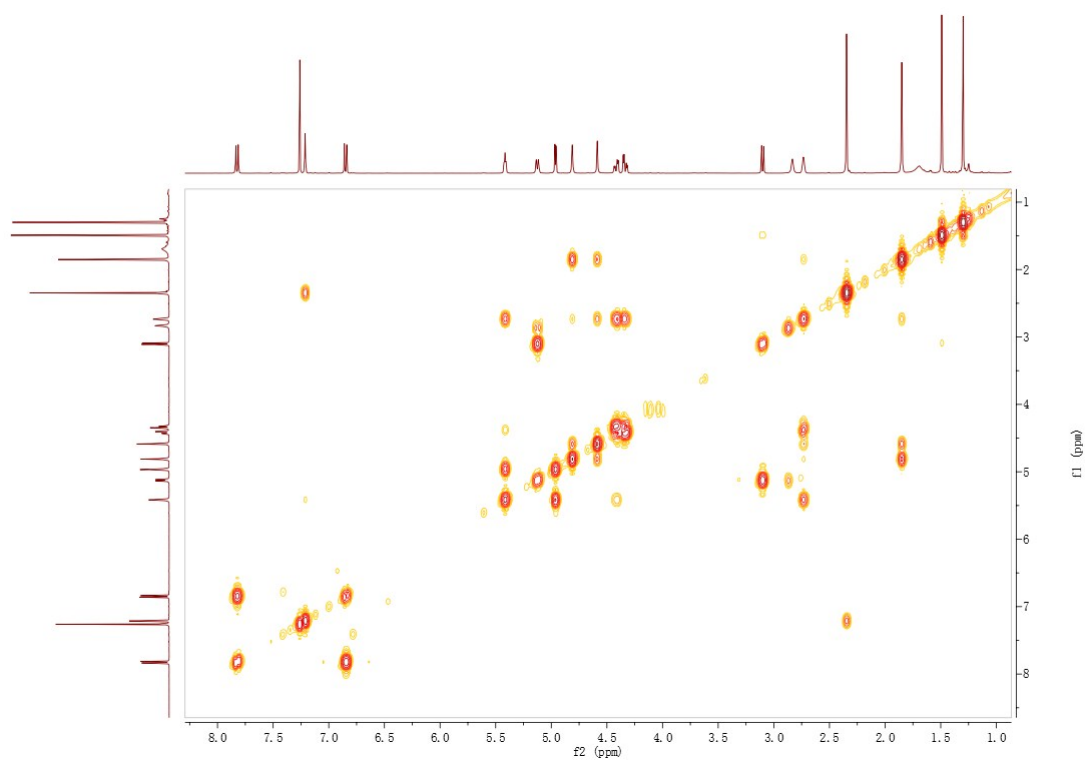

**Figure S3.**  $^1\text{H}$ ,  $^1\text{H}$  COSY spectrum of **1** ( $\text{CDCl}_3$ )

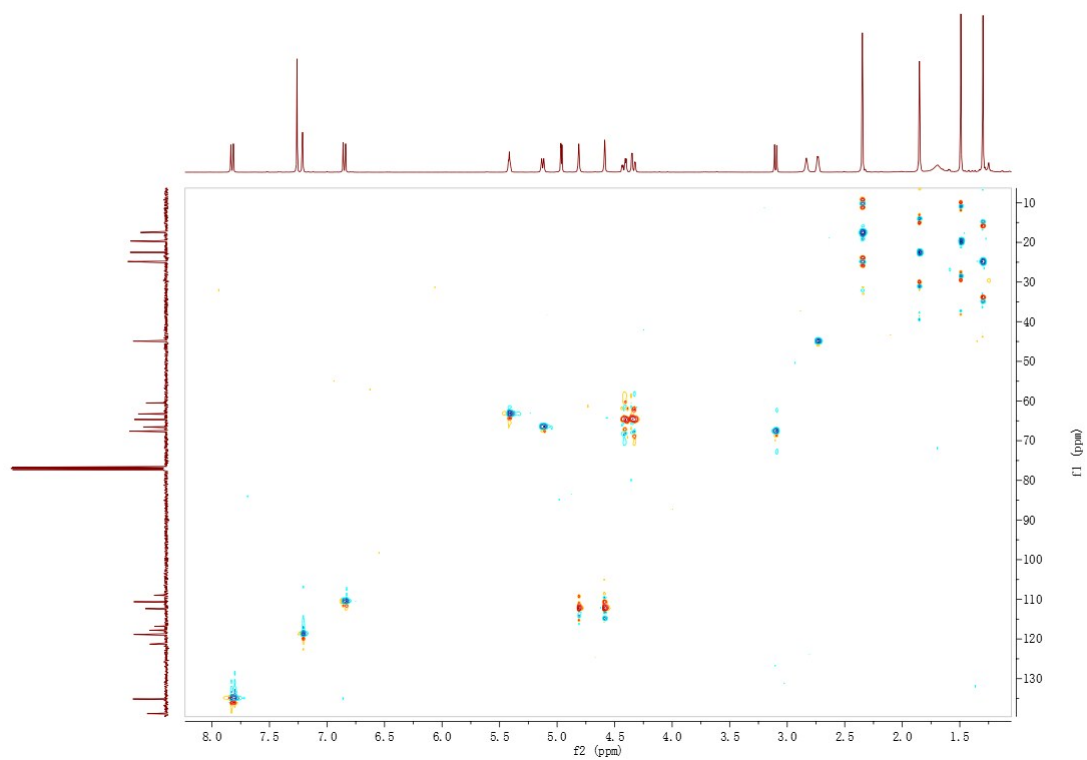

**Figure S4.** HMQC spectrum of **1** ( $\text{CDCl}_3$ )

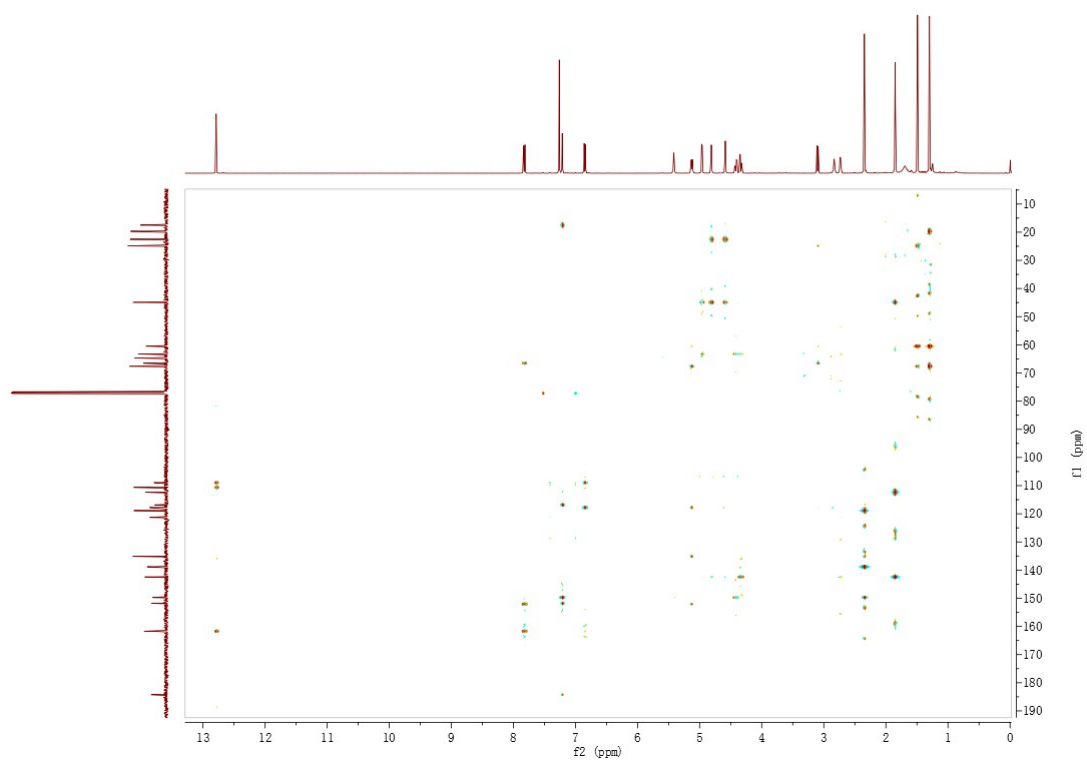

**Figure S5.** HMBC spectrum of **1** (CDCl<sub>3</sub>)

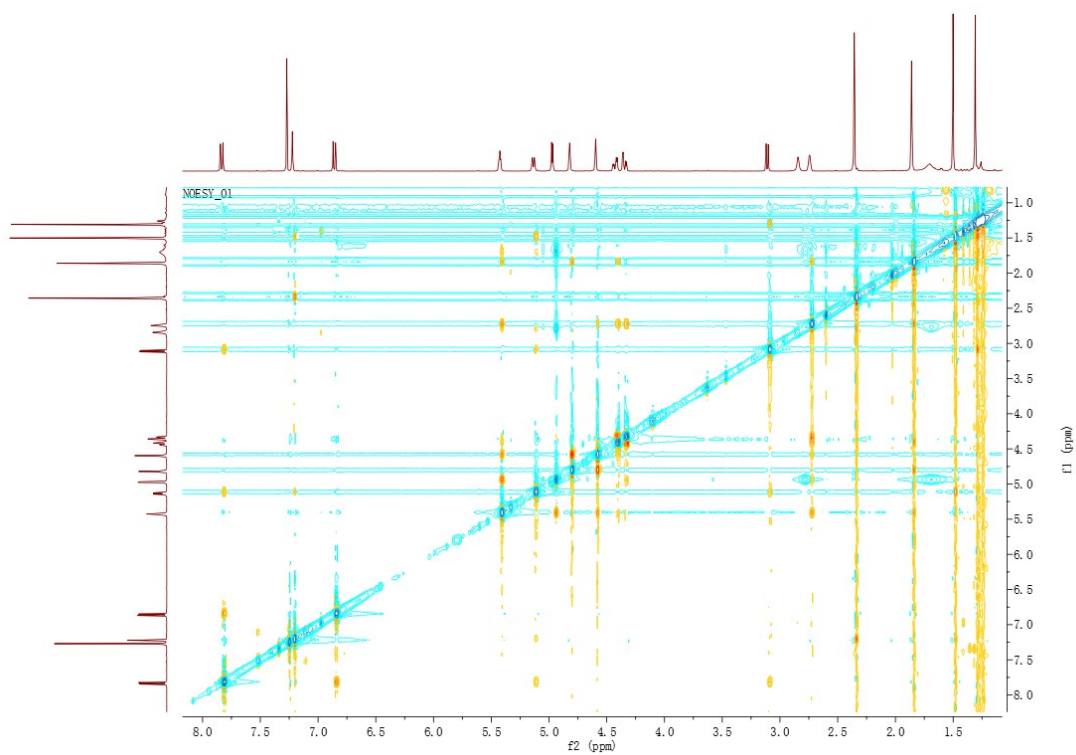

**Figure S6.** NOESY spectrum of **1** (CDCl<sub>3</sub>)

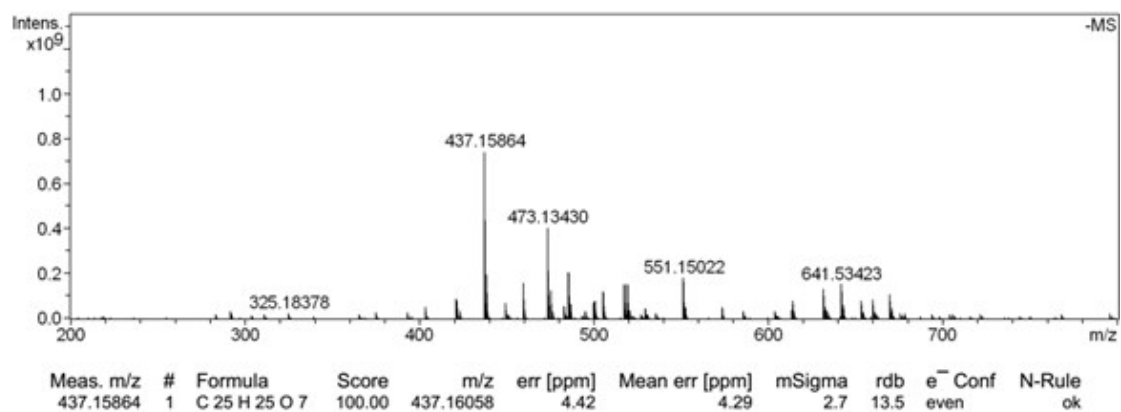

Figure S7. HRESIMS spectrum of 1

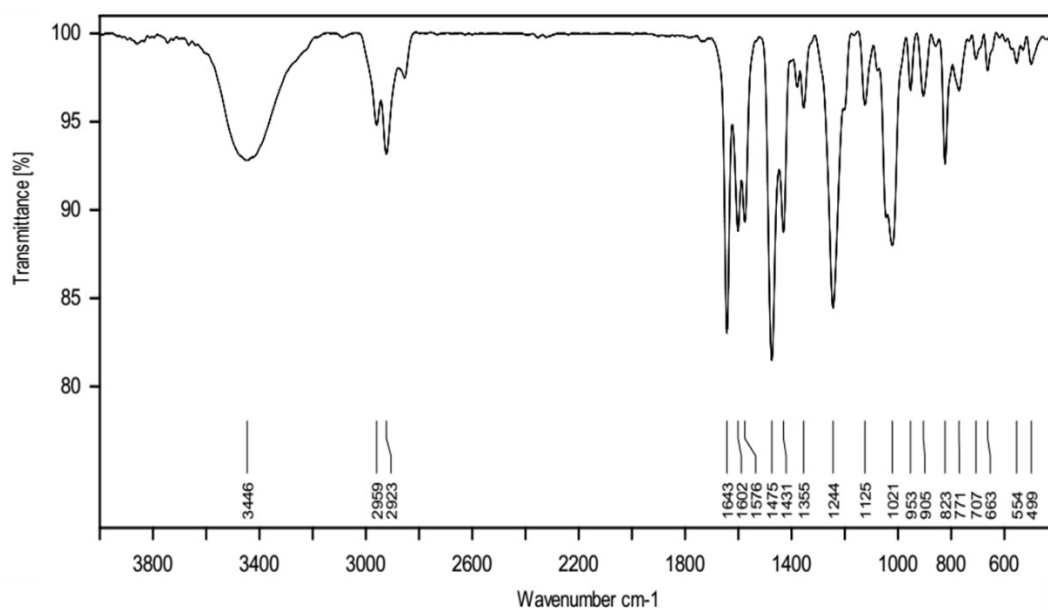

Figure S8. IR spectrum of 1

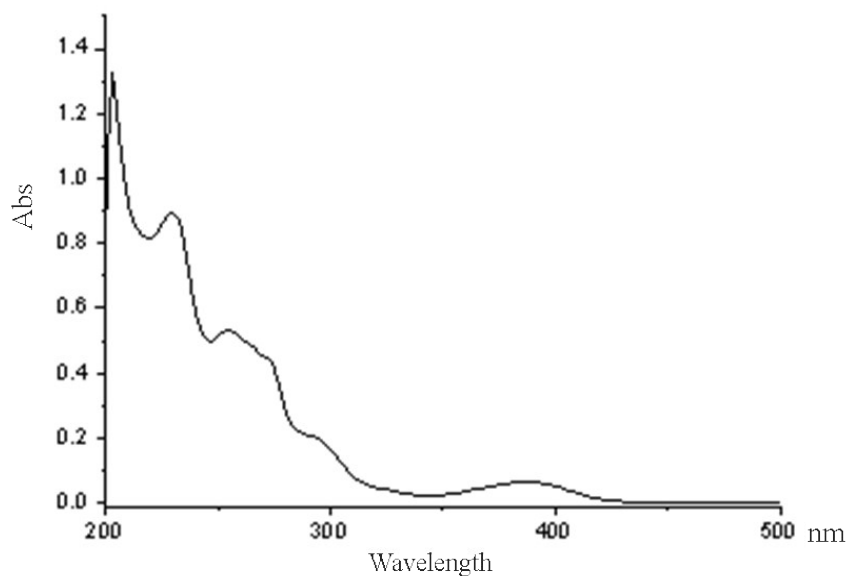

Figure S9. UV spectrum of 1

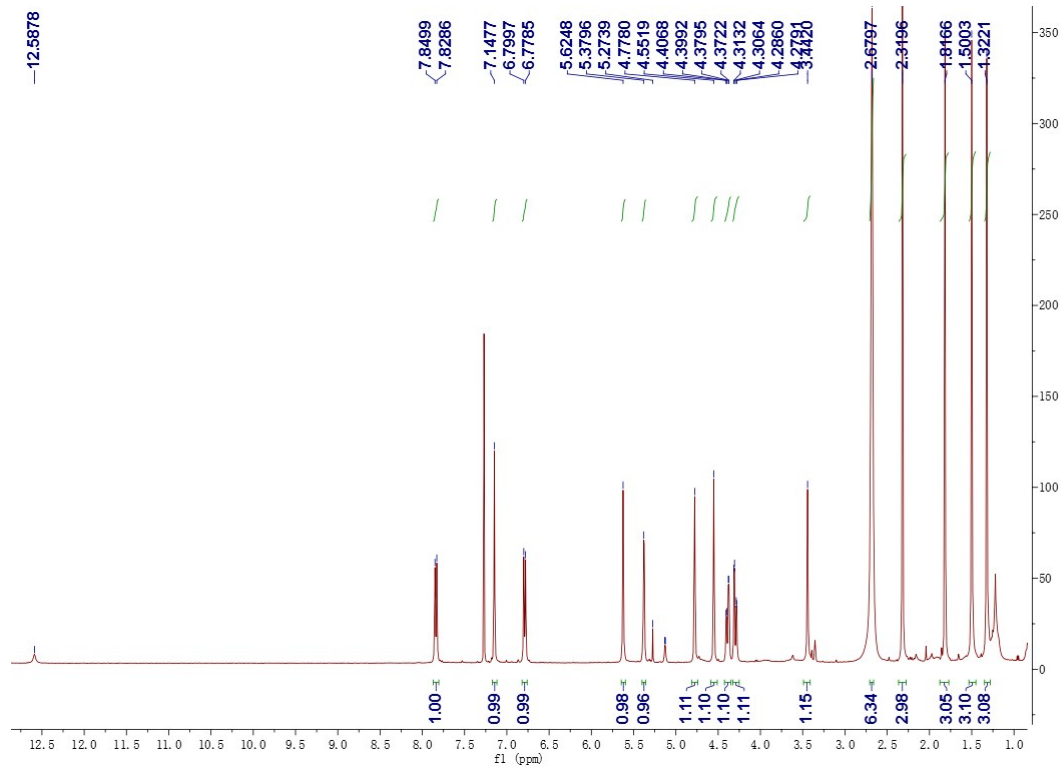

Figure S10.  $^1\text{H}$  NMR spectrum of **2** ( $\text{CDCl}_3$ , 400 MHz)

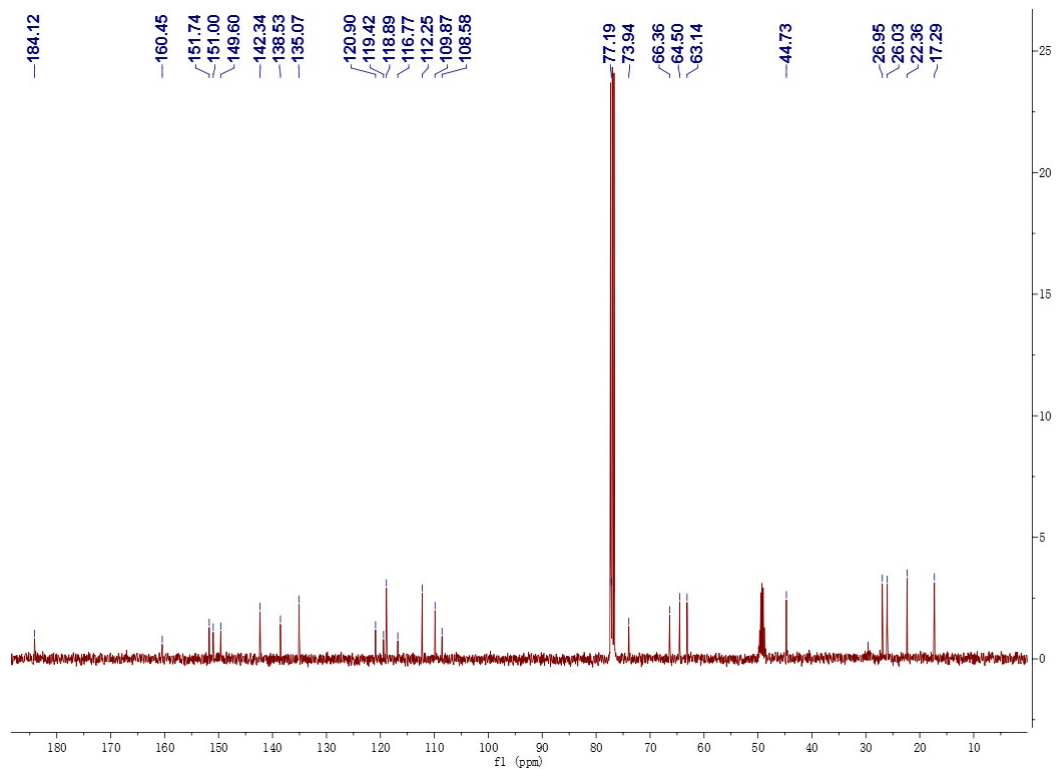

Figure S11.  $^{13}\text{C}$  NMR spectrum of **2** ( $\text{CDCl}_3$ , 100 MHz)



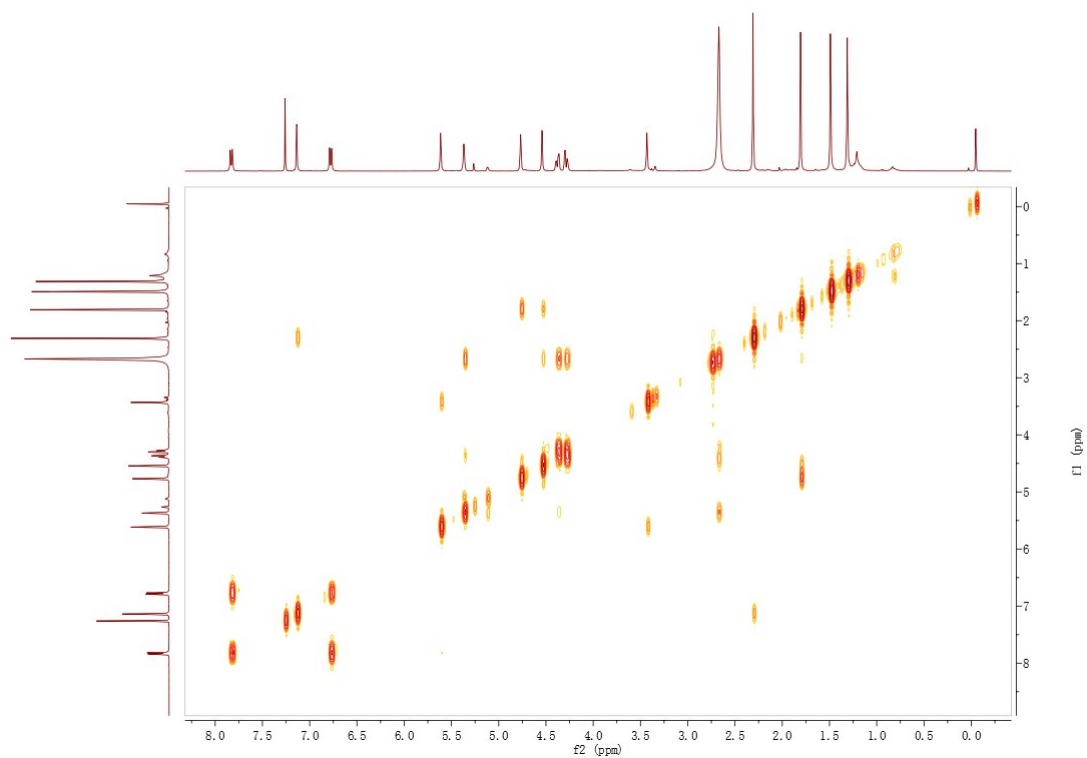

**Figure S12.**  $^1\text{H}$ ,  $^1\text{H}$  COSY spectrum of **2** ( $\text{CDCl}_3$ )

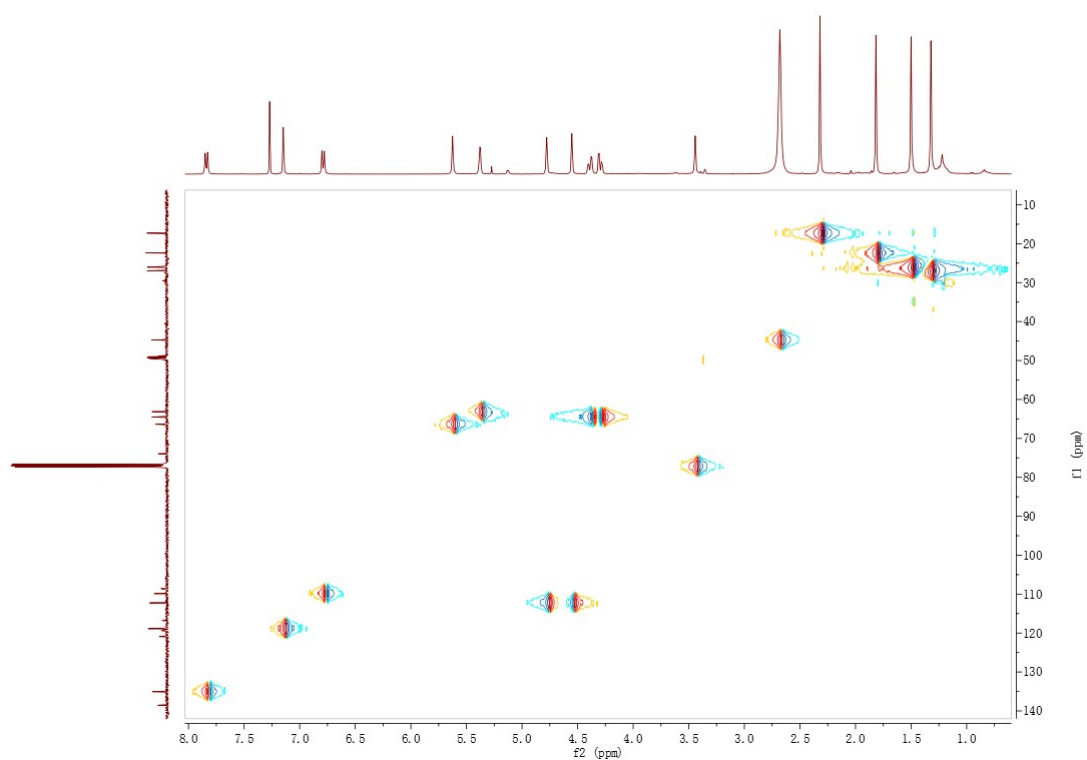

**Figure S13.** HMQC spectrum of **2** ( $\text{CDCl}_3$ )

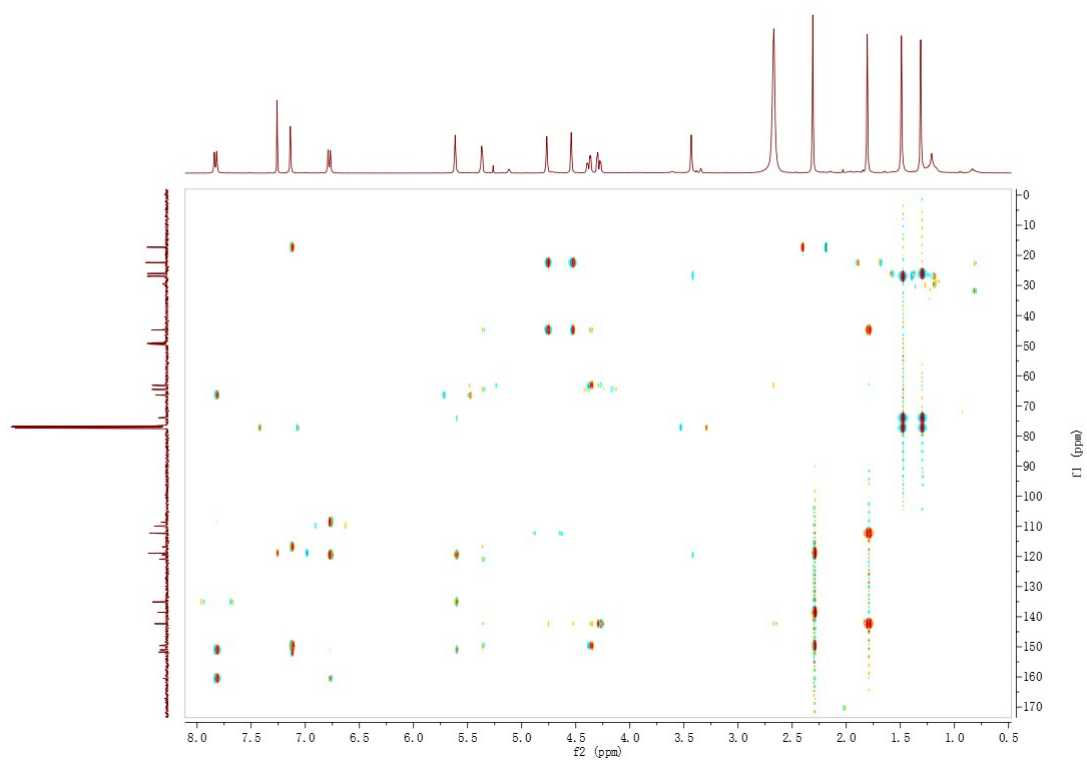

**Figure S14.** HMBC spectrum of **2** (CDCl<sub>3</sub>)

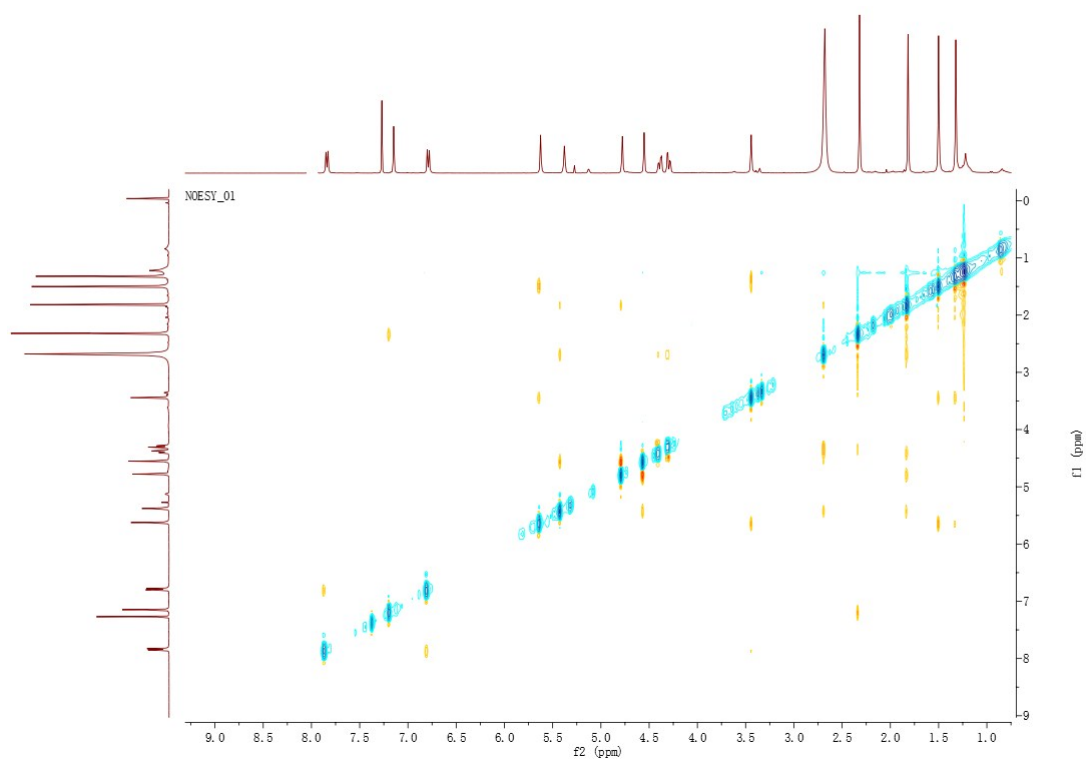

**Figure S15.** NOESY spectrum of **2** (CDCl<sub>3</sub>)

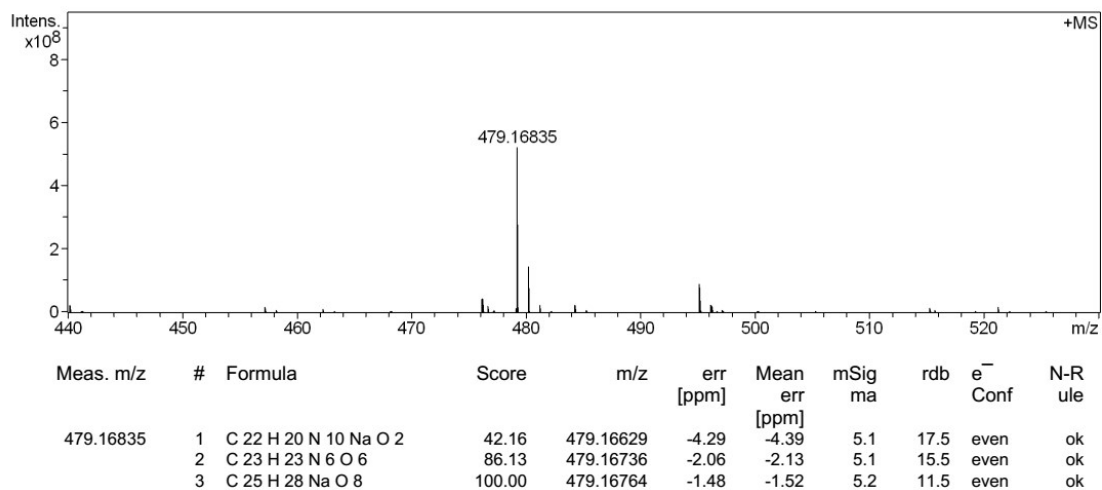

Figure S16. HRESIMS spectrum of 2

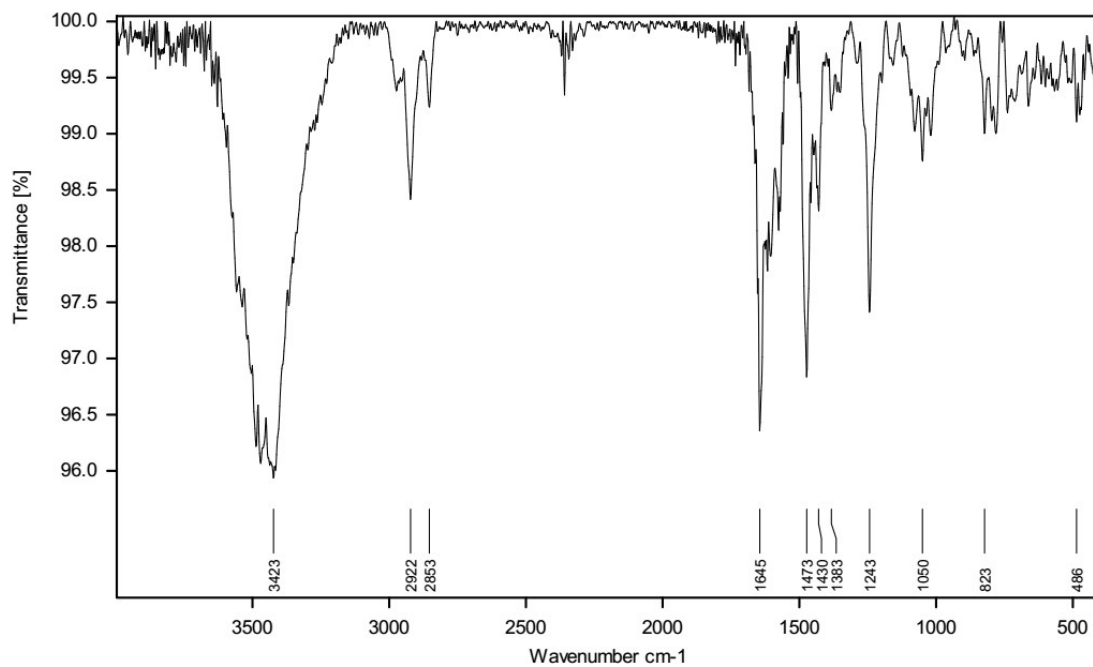

Figure S17. IR spectrum of 2

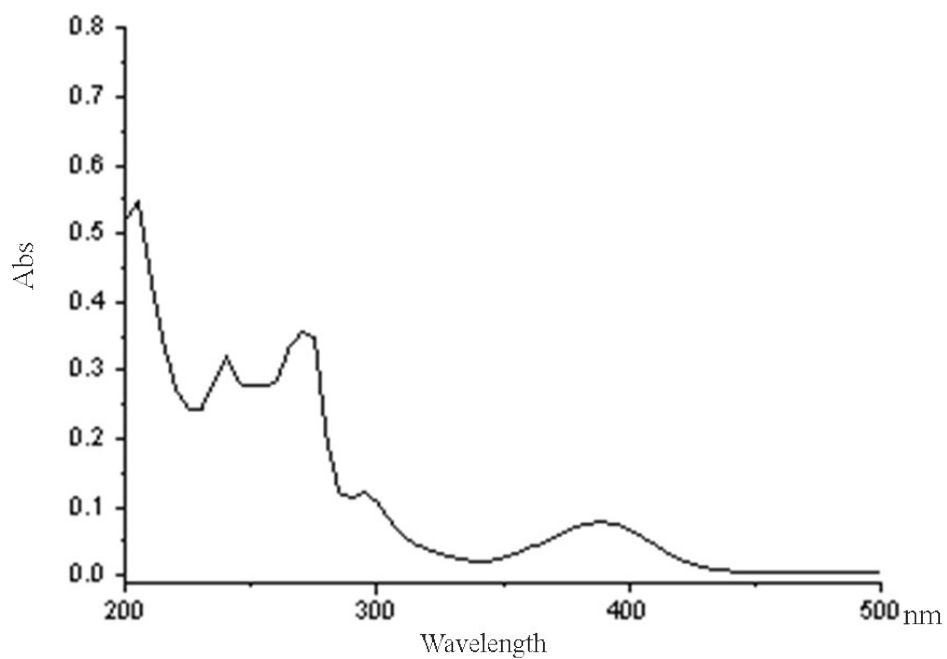

Figure S18. UV spectrum of 2

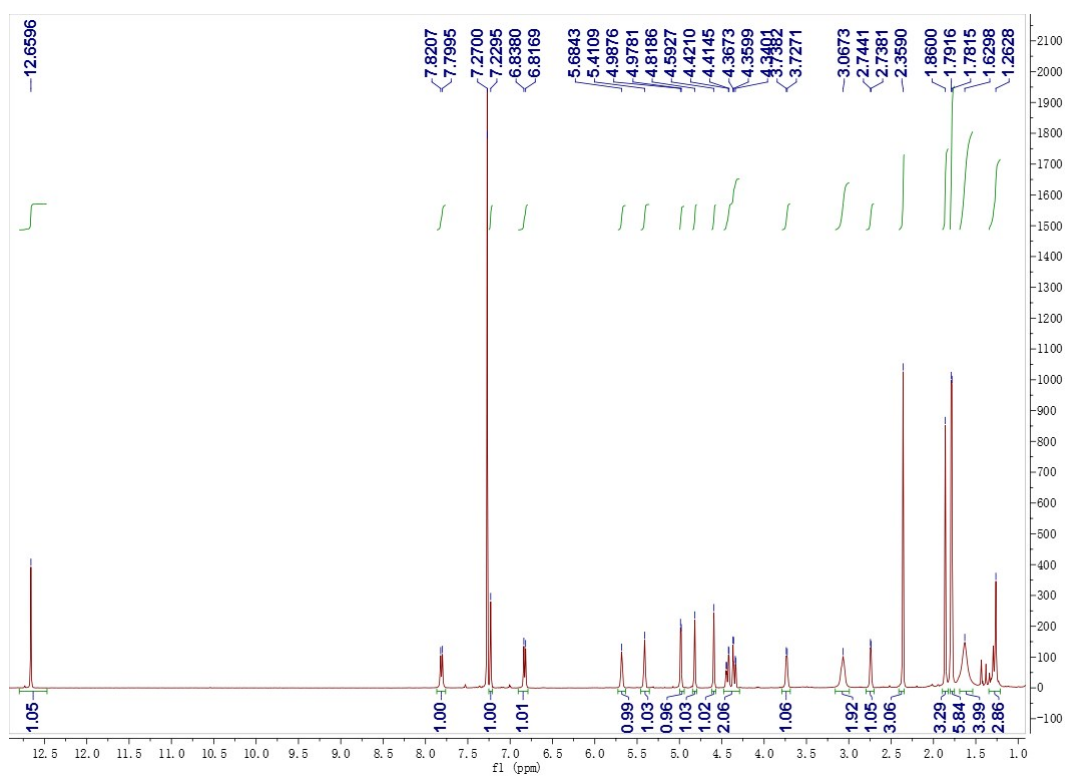

Figure S19.  $^1\text{H}$  NMR spectrum of 3 ( $\text{CDCl}_3$ , 400 MHz)

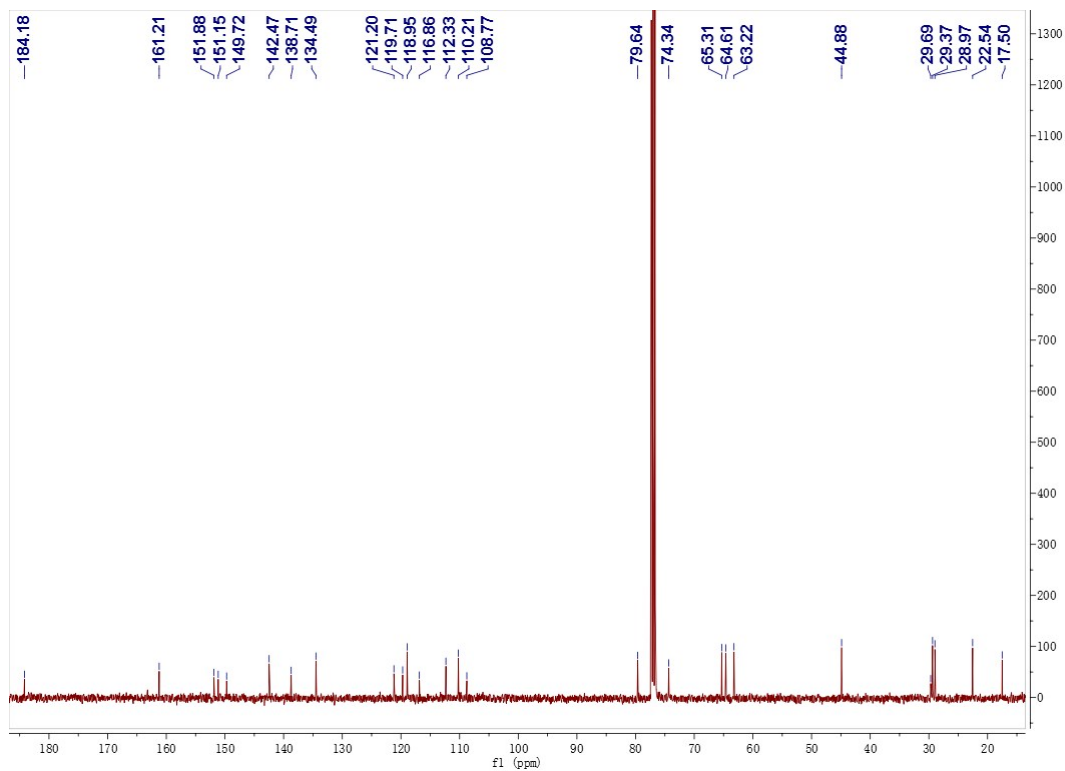

Figure S20.  $^{13}\text{C}$  NMR spectrum of **3** ( $\text{CDCl}_3$ , 100 MHz)

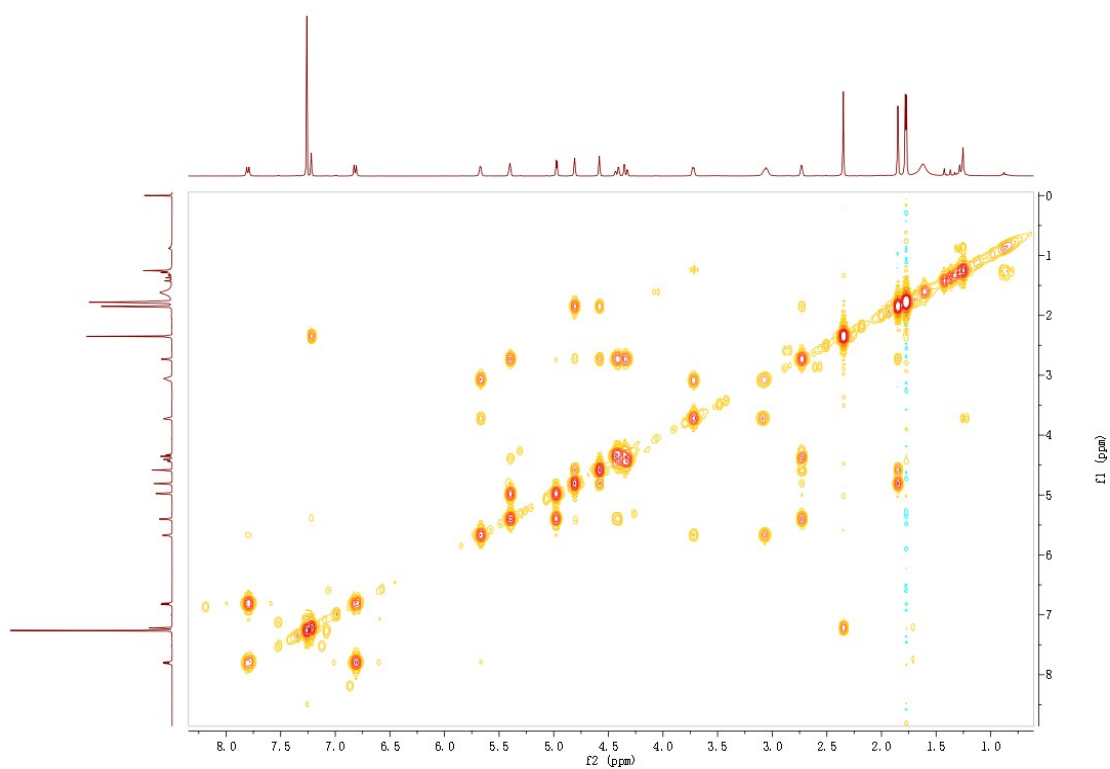

Figure S21.  $^1\text{H}$ ,  $^1\text{H}$  COSY spectrum of **3** ( $\text{CDCl}_3$ )

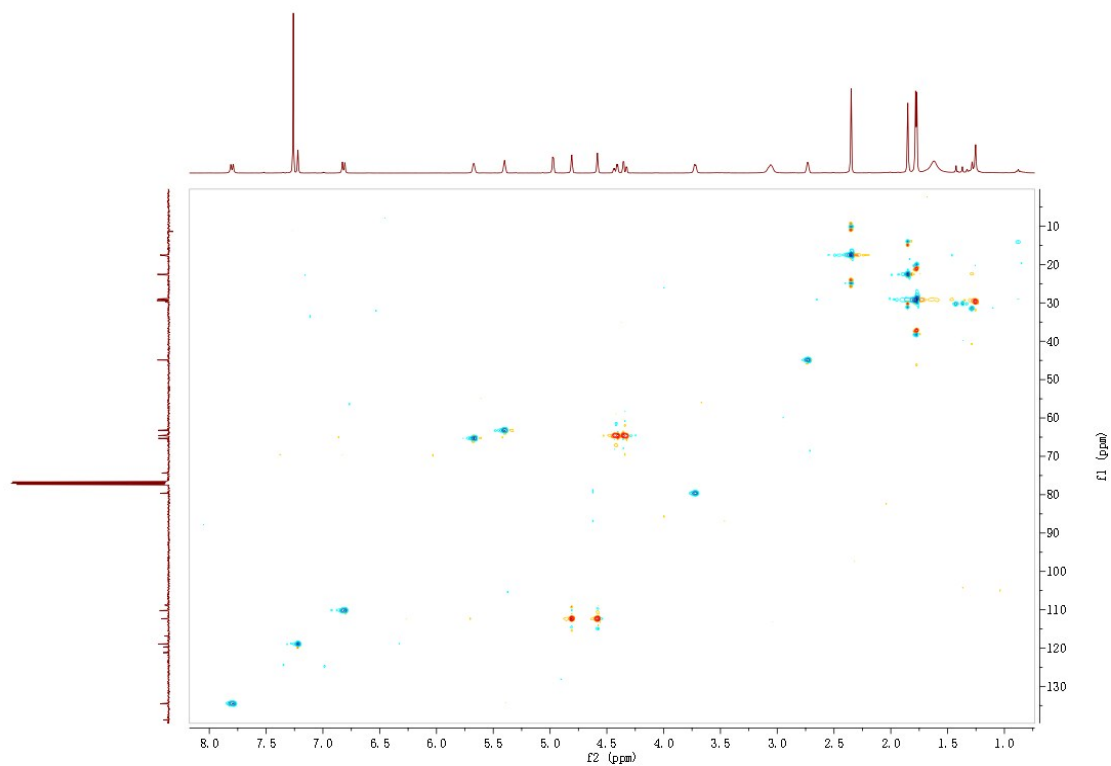

**Figure S22.** HMQC spectrum of **3** ( $\text{CDCl}_3$ )

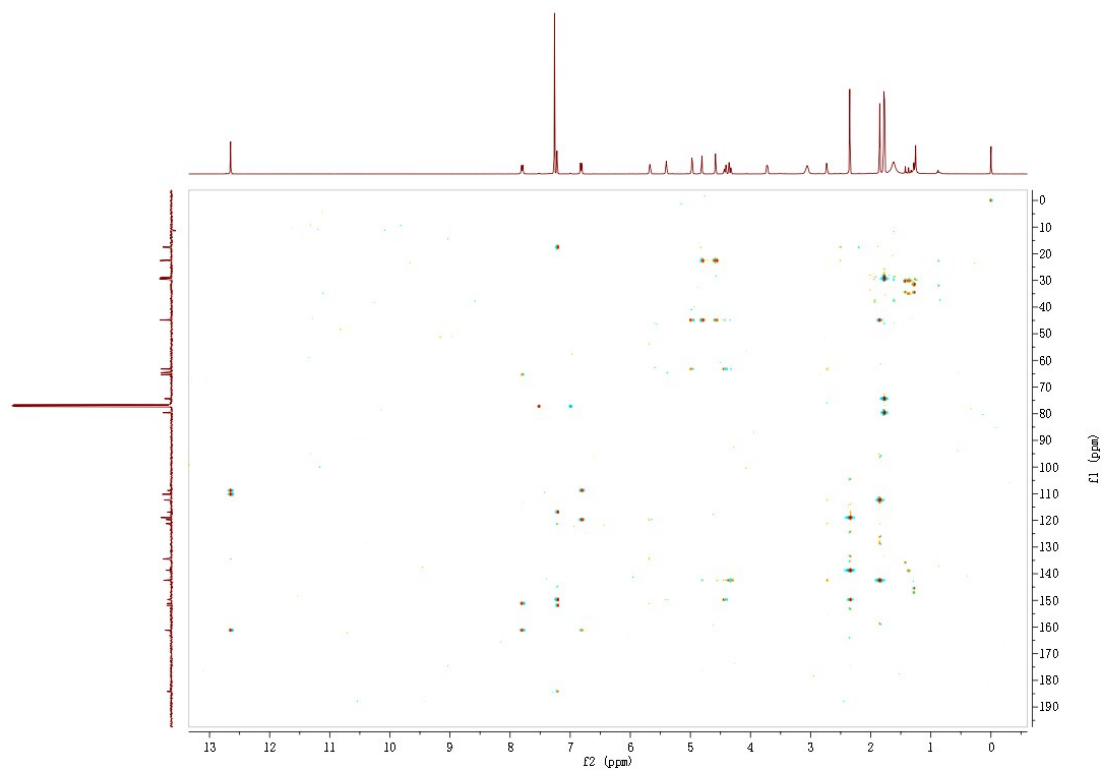

**Figure S23.** HMBC spectrum of **3** ( $\text{CDCl}_3$ )

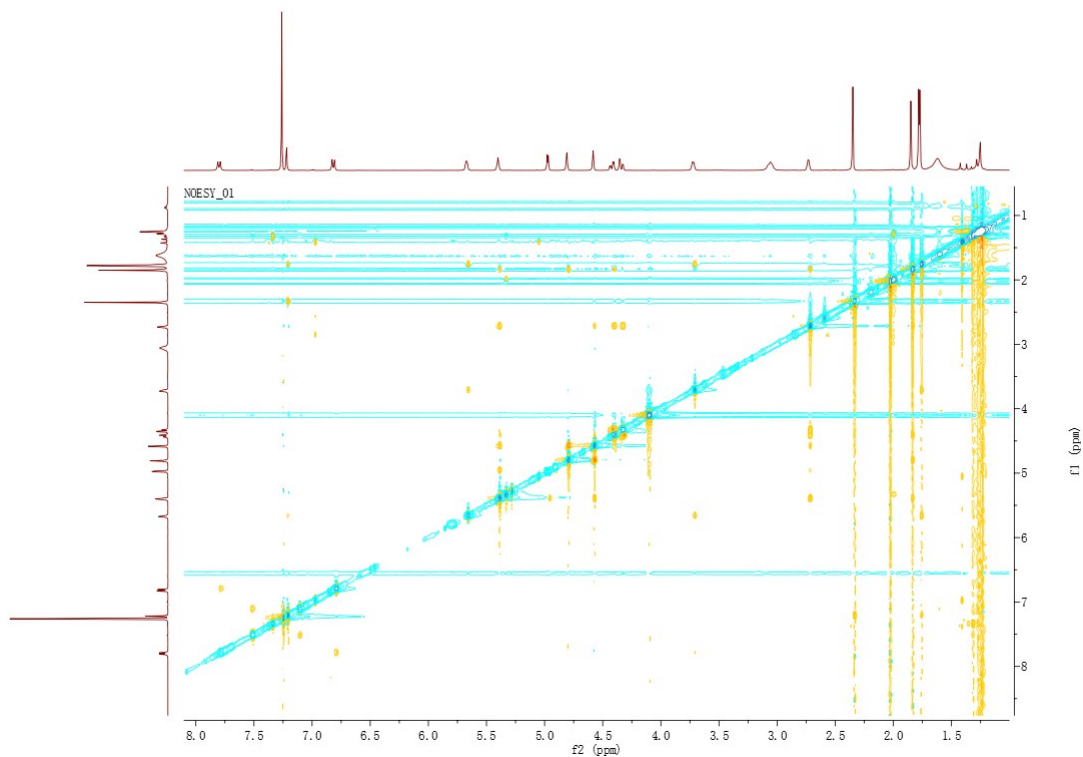

**Figure S24.** NOESY spectrum of **3** ( $\text{CDCl}_3$ )

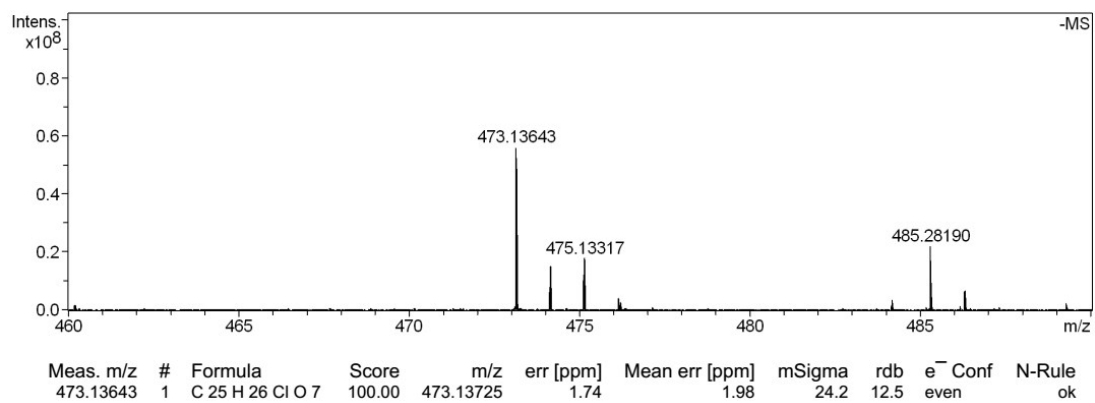

**Figure S25.** HRESIMS spectrum of **3**

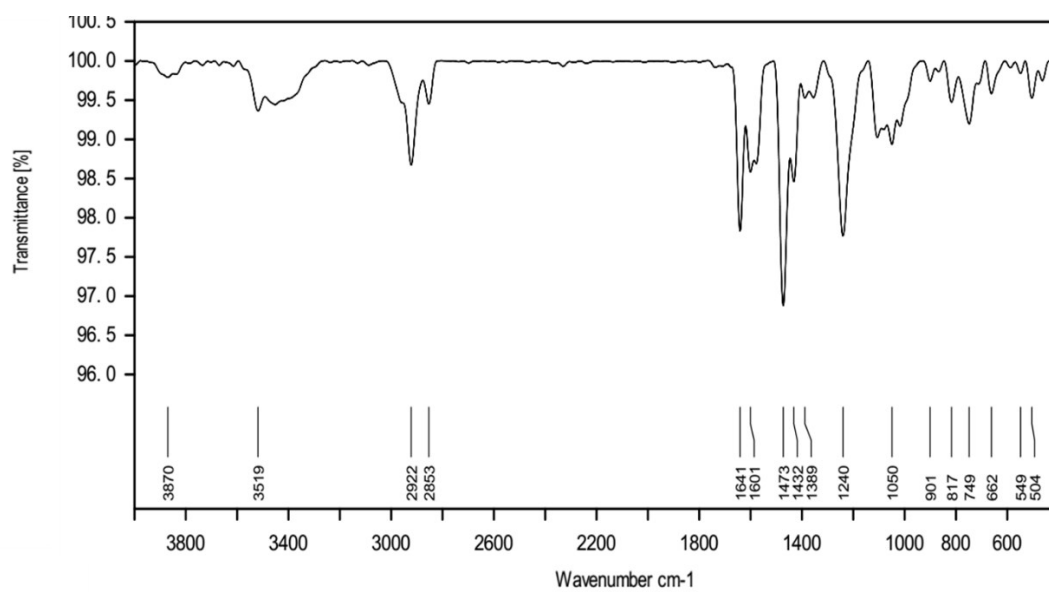

**Figure S26.** IR spectrum of **3**

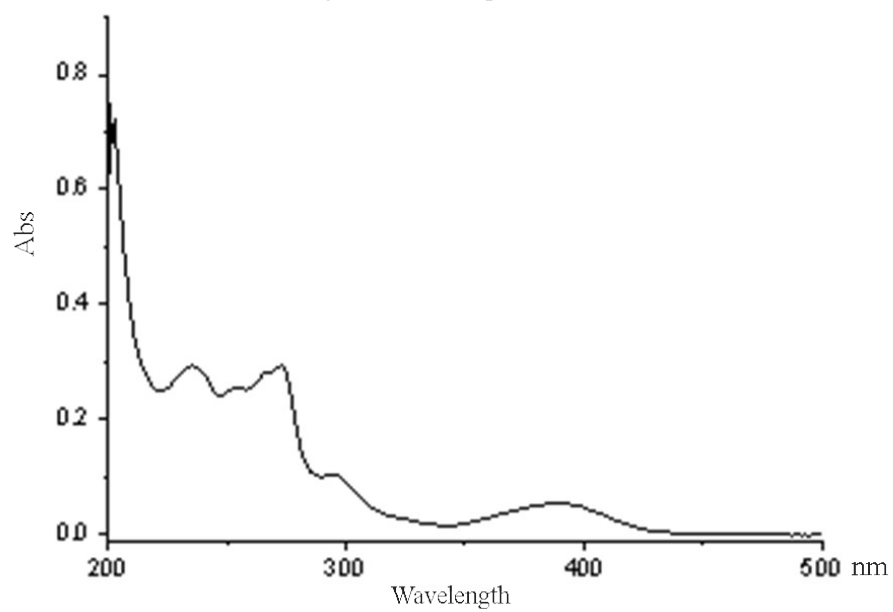

**Figure S27.** UV spectrum of **3**



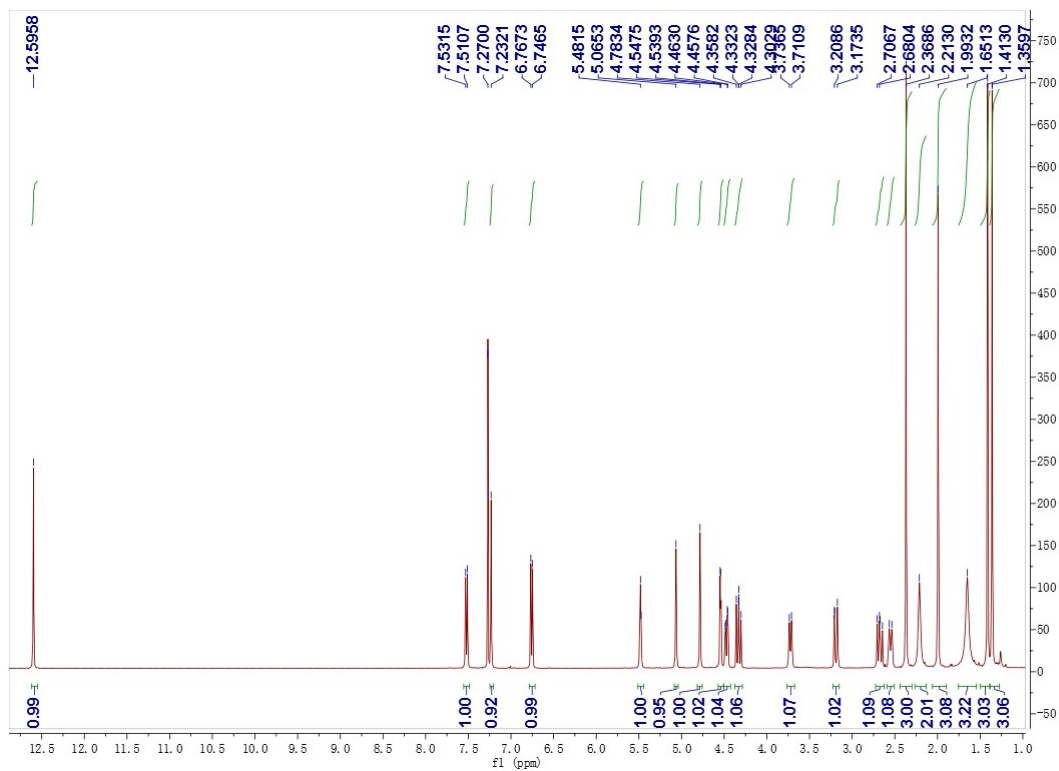

Figure S28.  $^1\text{H}$  NMR spectrum of **4** ( $\text{CDCl}_3$ , 400 MHz)

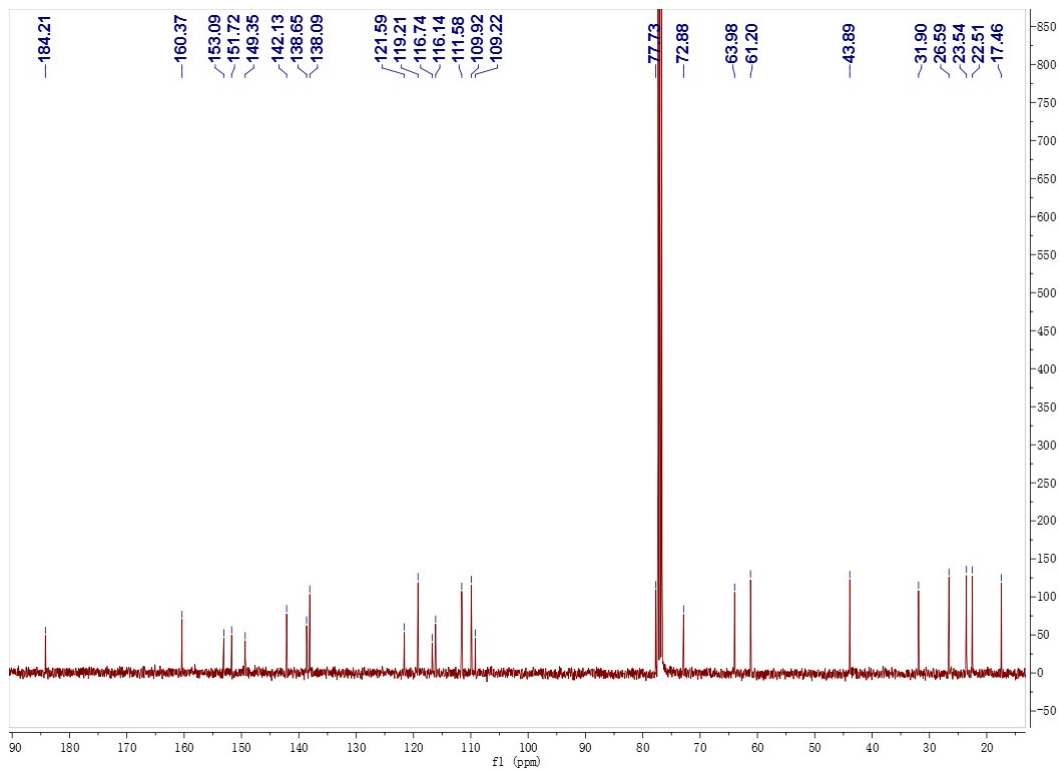

Figure S29.  $^{13}\text{C}$  NMR spectrum of **4** ( $\text{CDCl}_3$ , 100 MHz)

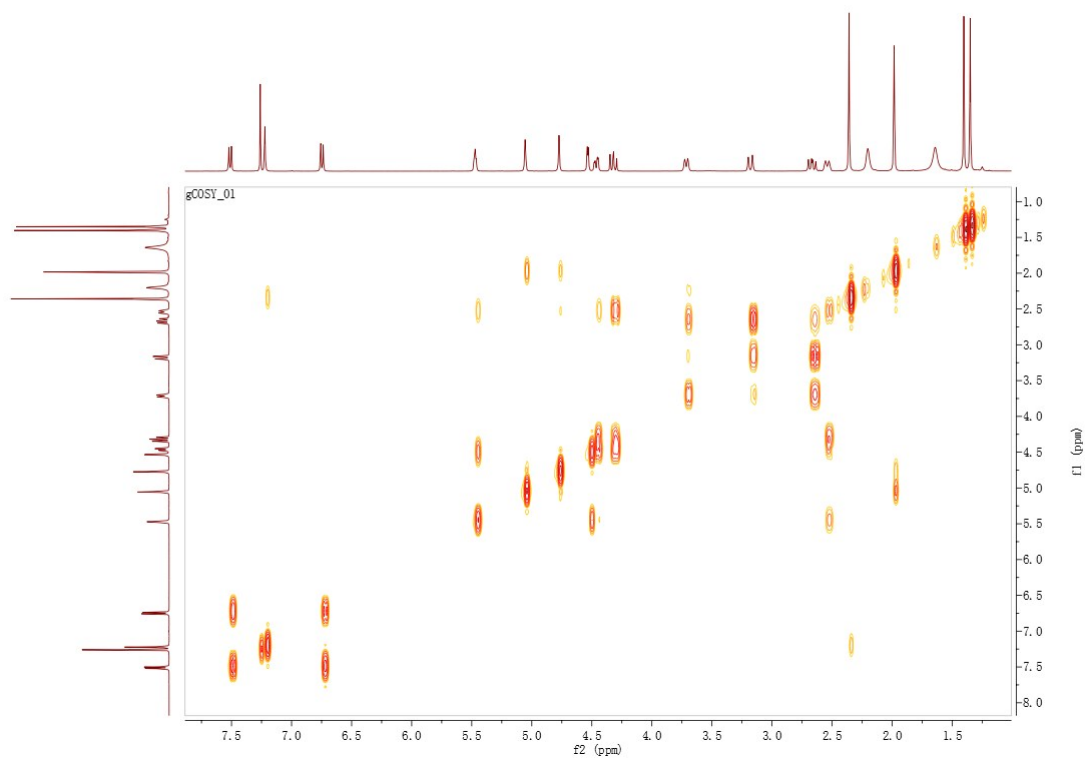

**Figure S30.**  $^1\text{H}$ ,  $^1\text{H}$  COSY spectrum of **4** ( $\text{CDCl}_3$ )

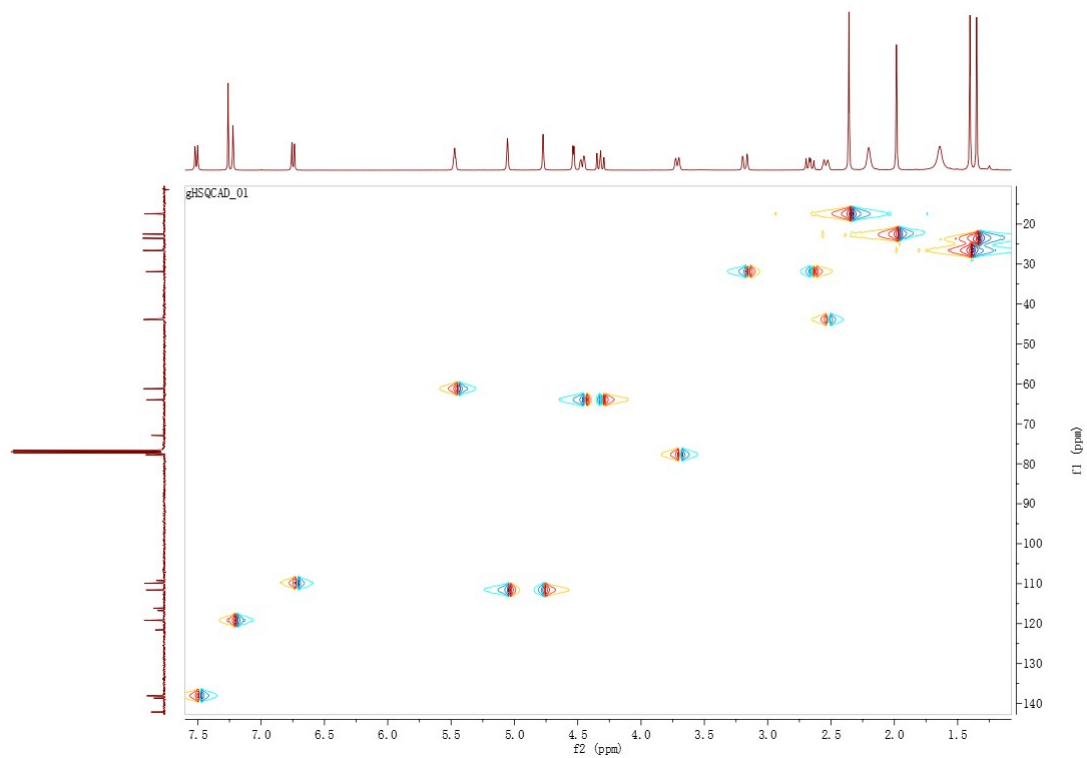

**Figure S31.** HMQC spectrum of **4** ( $\text{CDCl}_3$ )

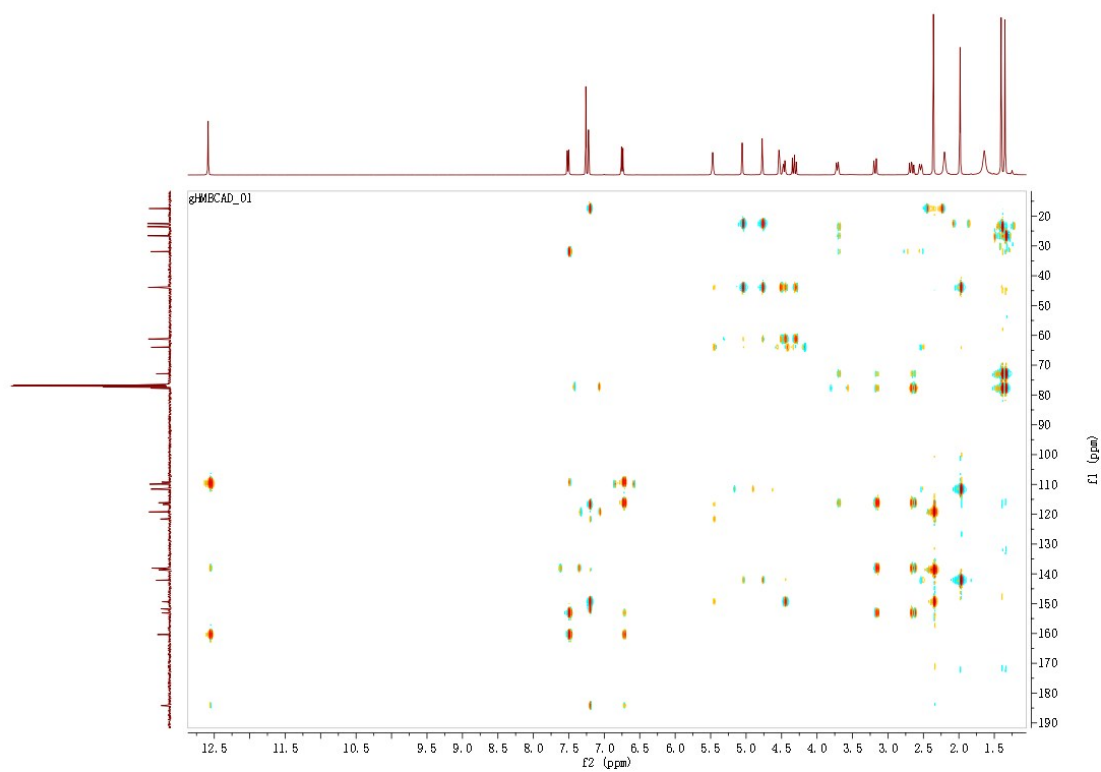

**Figure S32.** HMBC spectrum of **4** (CDCl<sub>3</sub>)

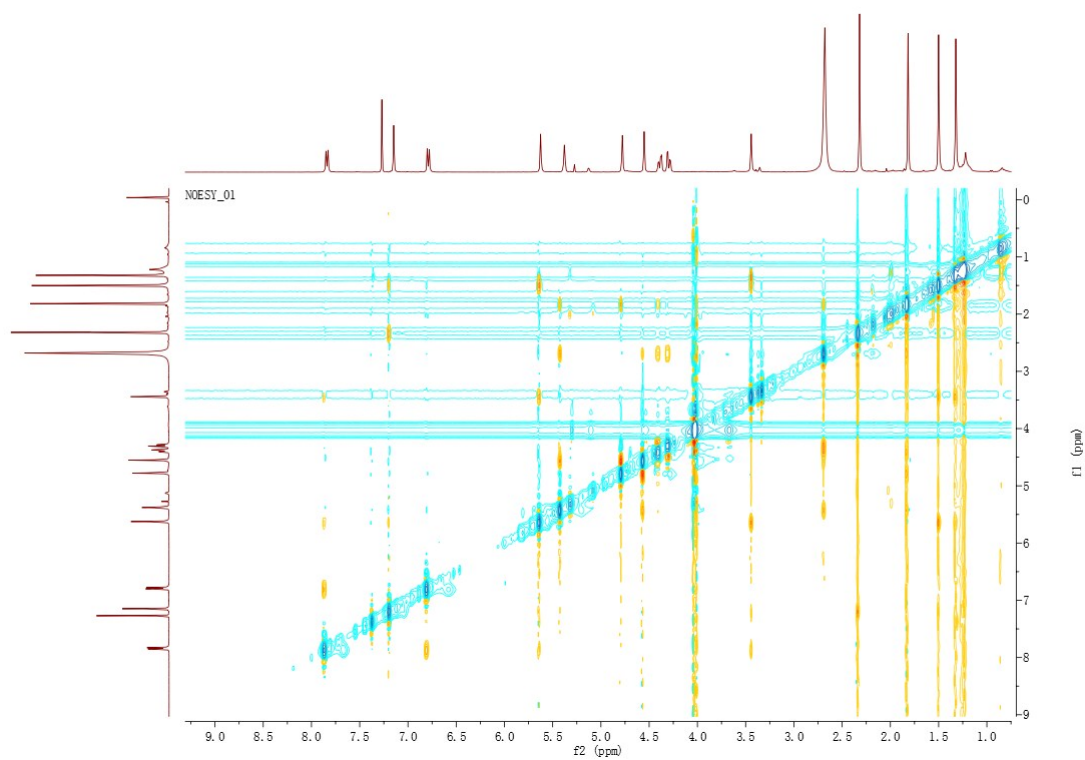

**Figure S33.** NOESY spectrum of **4** (CDCl<sub>3</sub>)

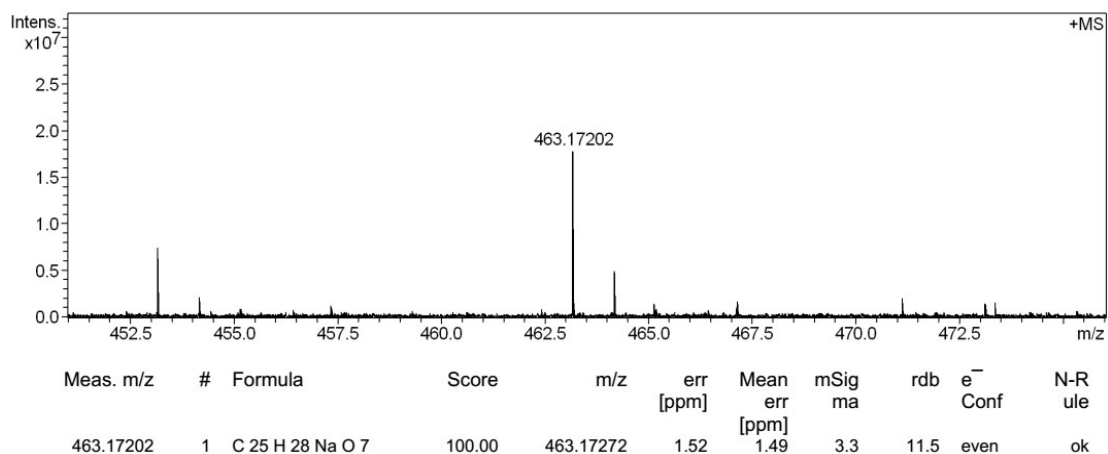

**Figure S34.** HRESIMS spectrum of **4**

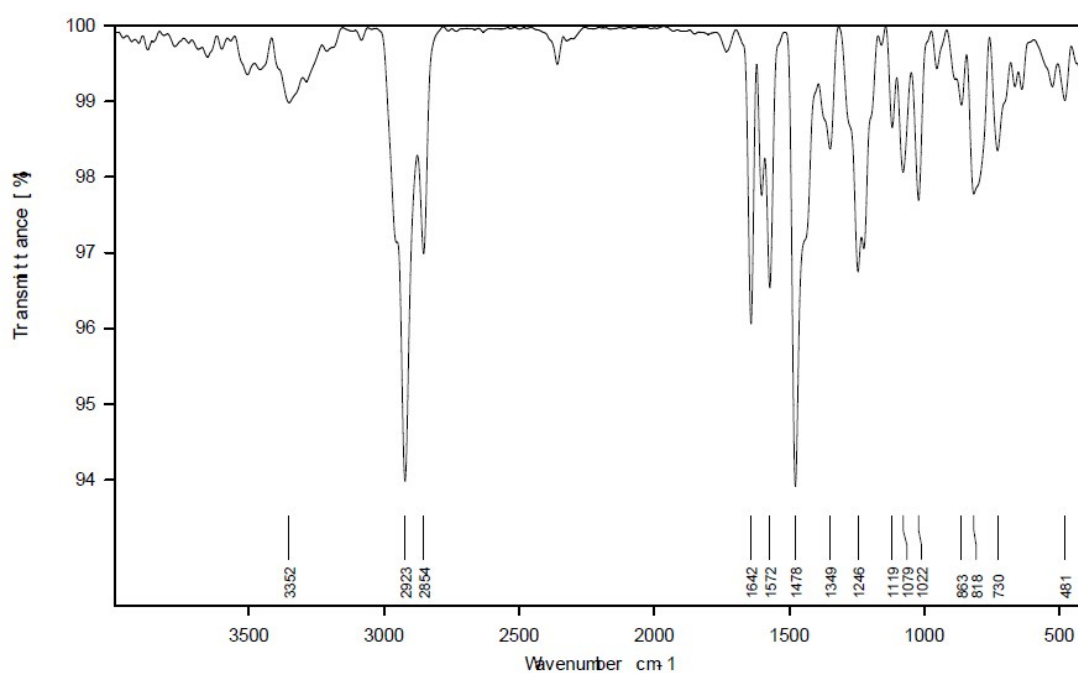

**Figure S35.** IR spectrum of **4**

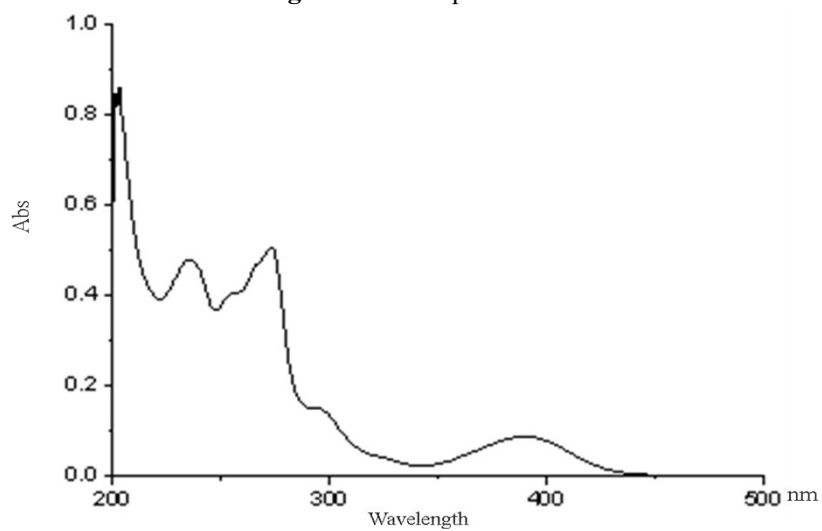

**Figure S36.** UV spectrum of **4**

|                                             |                                                               |
|---------------------------------------------|---------------------------------------------------------------|
| Empirical formula                           | C <sub>25</sub> H <sub>28</sub> O <sub>7</sub>                |
| Formula weight                              | 440.47                                                        |
| Temperature/K                               | 293                                                           |
| Crystal system                              | monoclinic                                                    |
| Space group                                 | P2 <sub>1</sub>                                               |
| a/Å                                         | 6.2804(3)                                                     |
| b/Å                                         | 17.2710(6)                                                    |
| c/Å                                         | 10.3842(4)                                                    |
| α/°                                         | 90                                                            |
| β/°                                         | 101.759(4)                                                    |
| γ/°                                         | 90                                                            |
| Volume/Å <sup>3</sup>                       | 1102.72(8)                                                    |
| Z                                           | 2                                                             |
| ρ <sub>calc</sub> /cm <sup>3</sup>          | 1.327                                                         |
| μ/mm <sup>-1</sup>                          | 0.097                                                         |
| F(000)                                      | 468.0                                                         |
| Radiation                                   | Mo Kα (λ = 0.71073)                                           |
| 2θ range for data collection/°              | 7.012 to 52.744                                               |
| Index ranges                                | -7 ≤ h ≤ 7, -21 ≤ k ≤ 21, -8 ≤ l ≤ 12                         |
| Reflections collected                       | 7828                                                          |
| Independent reflections                     | 4482 [R <sub>int</sub> = 0.0246, R <sub>sigma</sub> = 0.0495] |
| Data/restraints/parameters                  | 4482/1/305                                                    |
| Goodness-of-fit on F <sup>2</sup>           | 1.057                                                         |
| Final R indexes [I ≥ 2σ (I)]                | R <sub>1</sub> = 0.0478, wR <sub>2</sub> = 0.1072             |
| Final R indexes [all data]                  | R <sub>1</sub> = 0.0631, wR <sub>2</sub> = 0.1177             |
| Largest diff. peak/hole / e Å <sup>-3</sup> | 0.15/-0.23                                                    |
| Flack parameter                             | 0.5(6)                                                        |

**Table S1.** X-ray crystallographic data of **4**

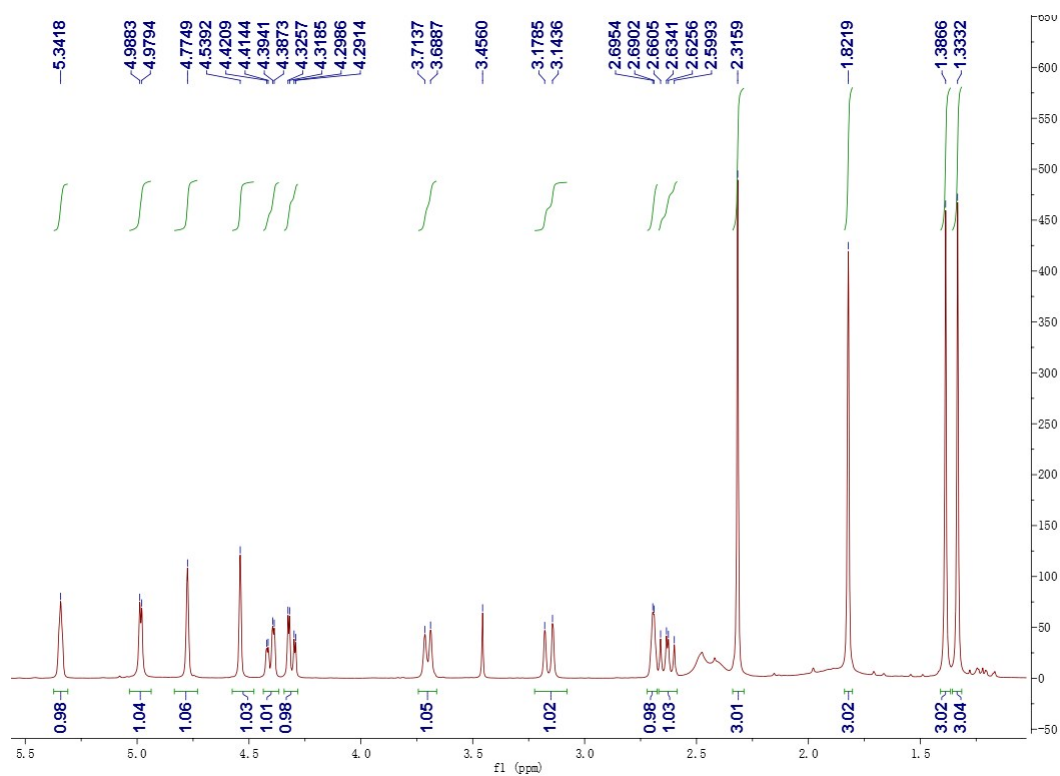

Figure S37.  $^1\text{H}$  NMR spectrum of **5** ( $\text{CDCl}_3$ , 400 MHz)

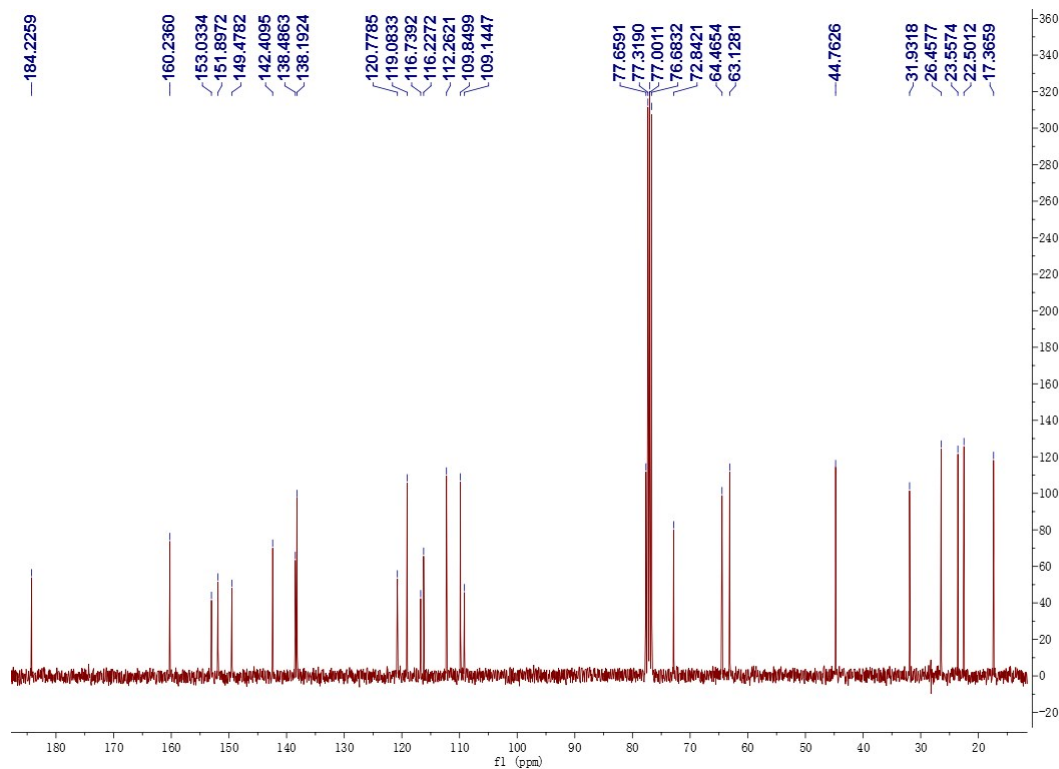

Figure S38.  $^{13}\text{C}$  NMR spectrum of **5** ( $\text{CDCl}_3$ , 100 MHz)

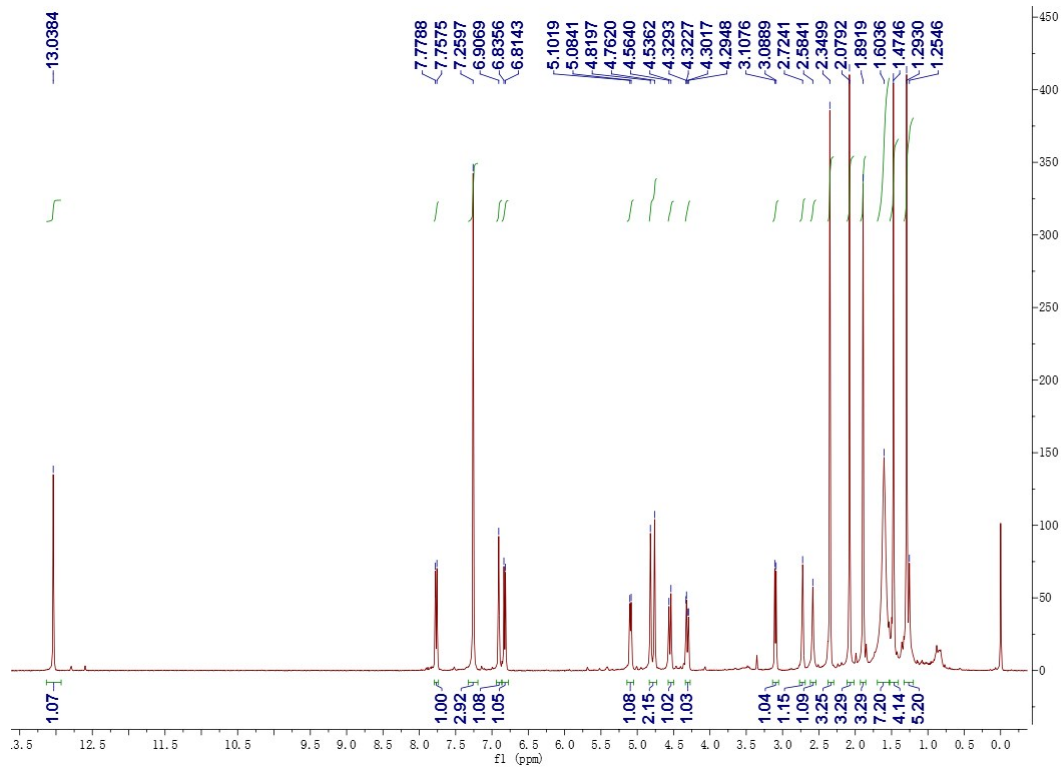

Figure S39.  $^1\text{H}$  NMR spectrum of **6** ( $\text{CDCl}_3$ , 400 MHz)

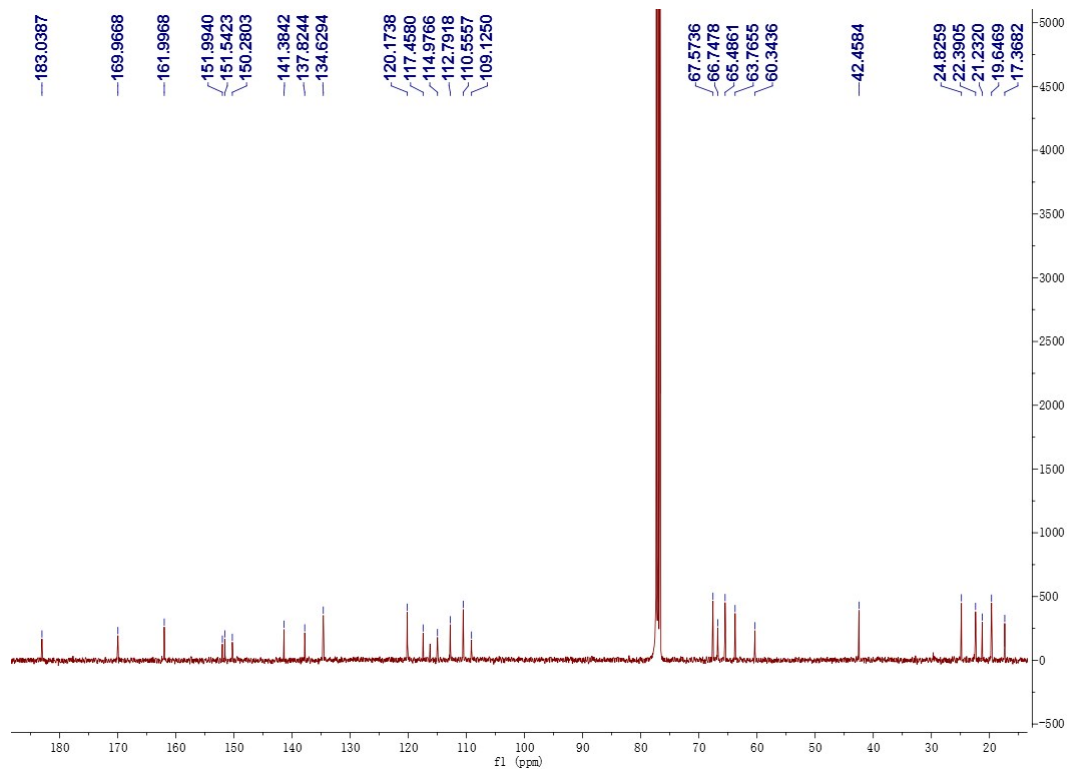

Figure S40.  $^{13}\text{C}$  NMR spectrum of **6** ( $\text{CDCl}_3$ , 100 MHz)

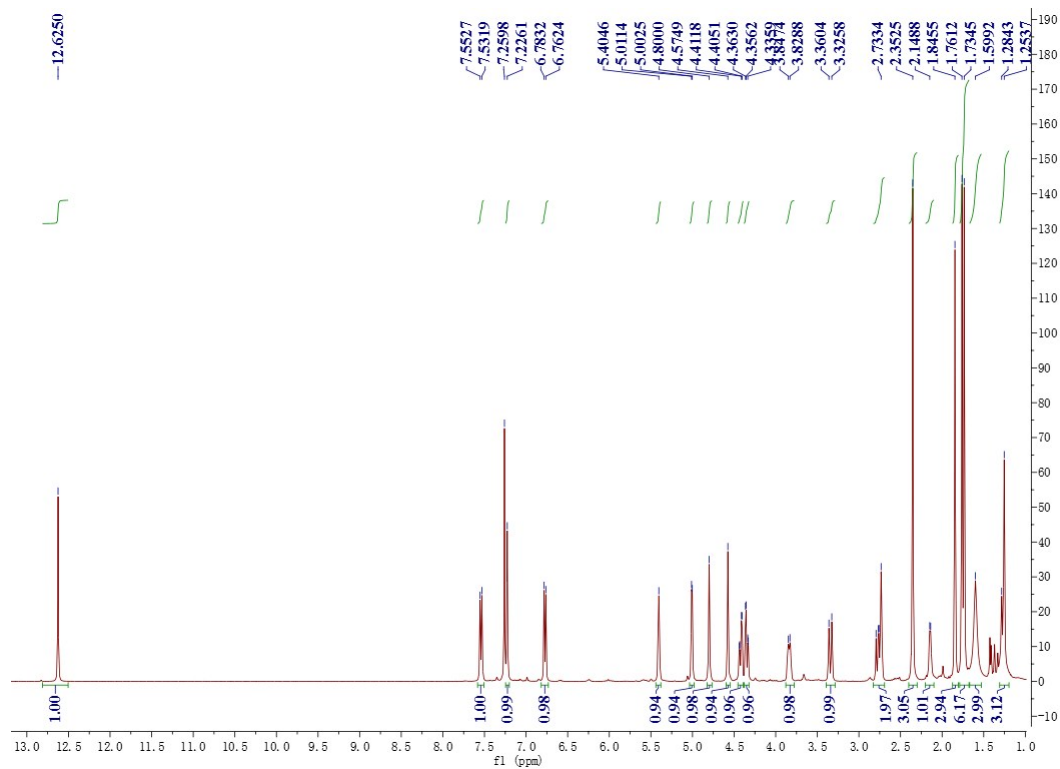

Figure S41.  $^1\text{H}$  NMR spectrum of **7** ( $\text{CDCl}_3$ , 400 MHz)

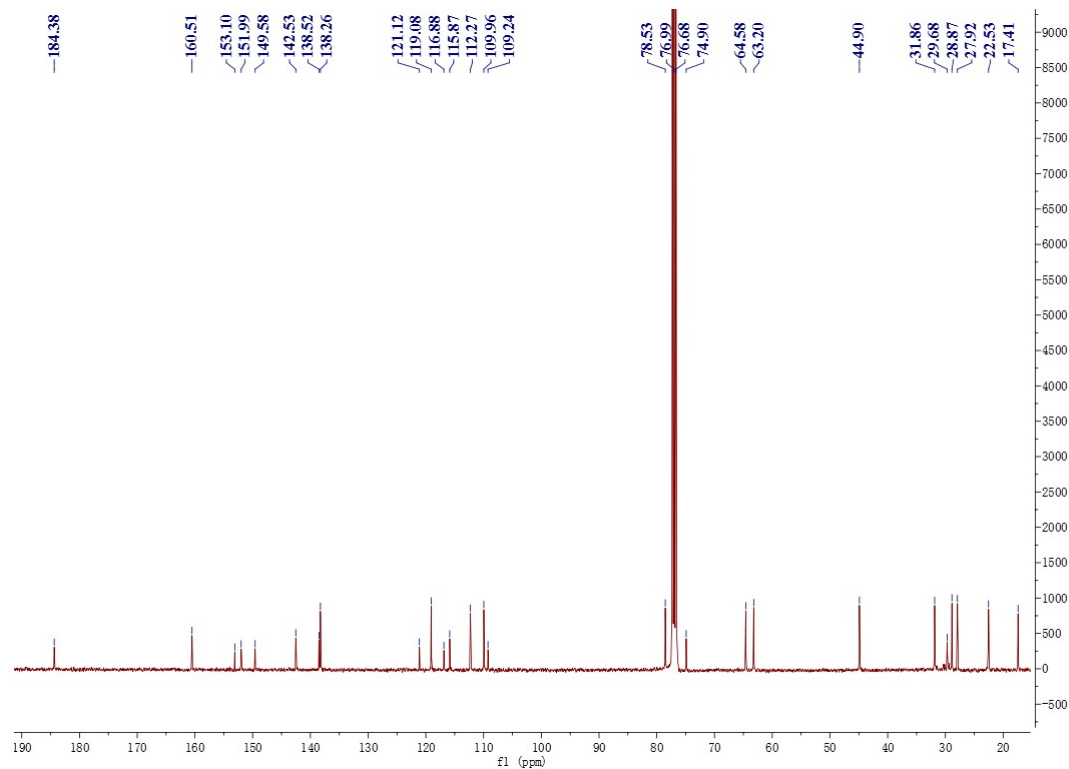

Figure S42.  $^{13}\text{C}$  NMR spectrum of **7** ( $\text{CDCl}_3$ , 100 MHz)



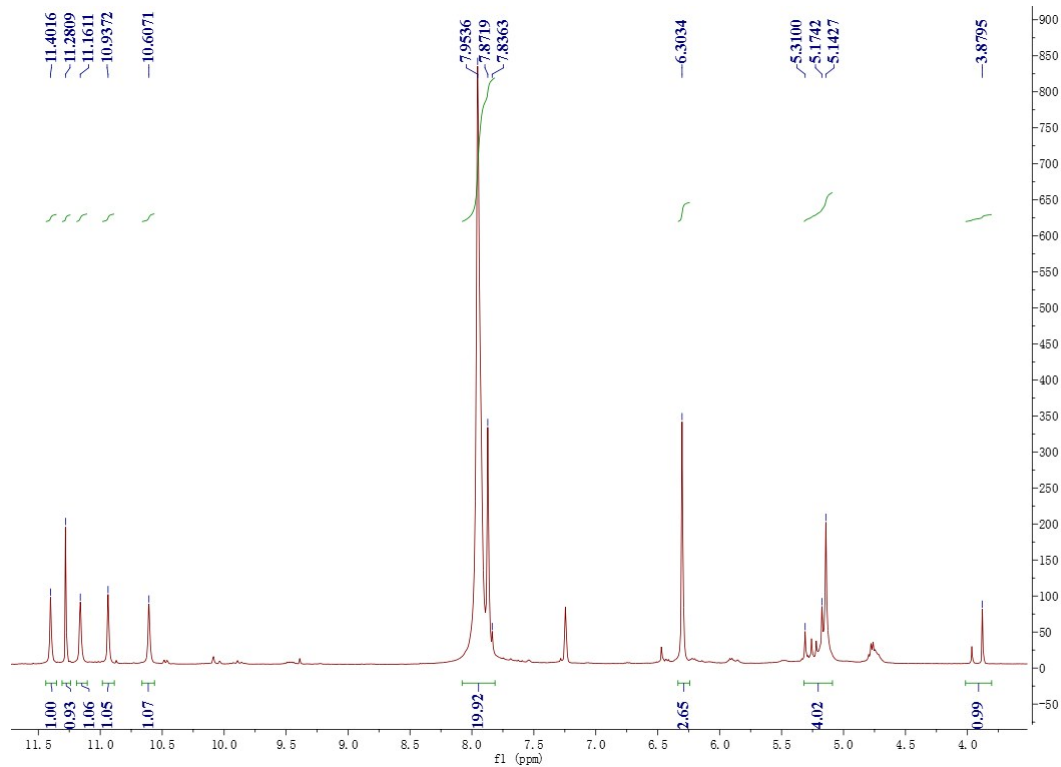

Figure S43.  $^1\text{H}$  NMR spectrum of **8** ( $\text{CDCl}_3$ , 400 MHz)

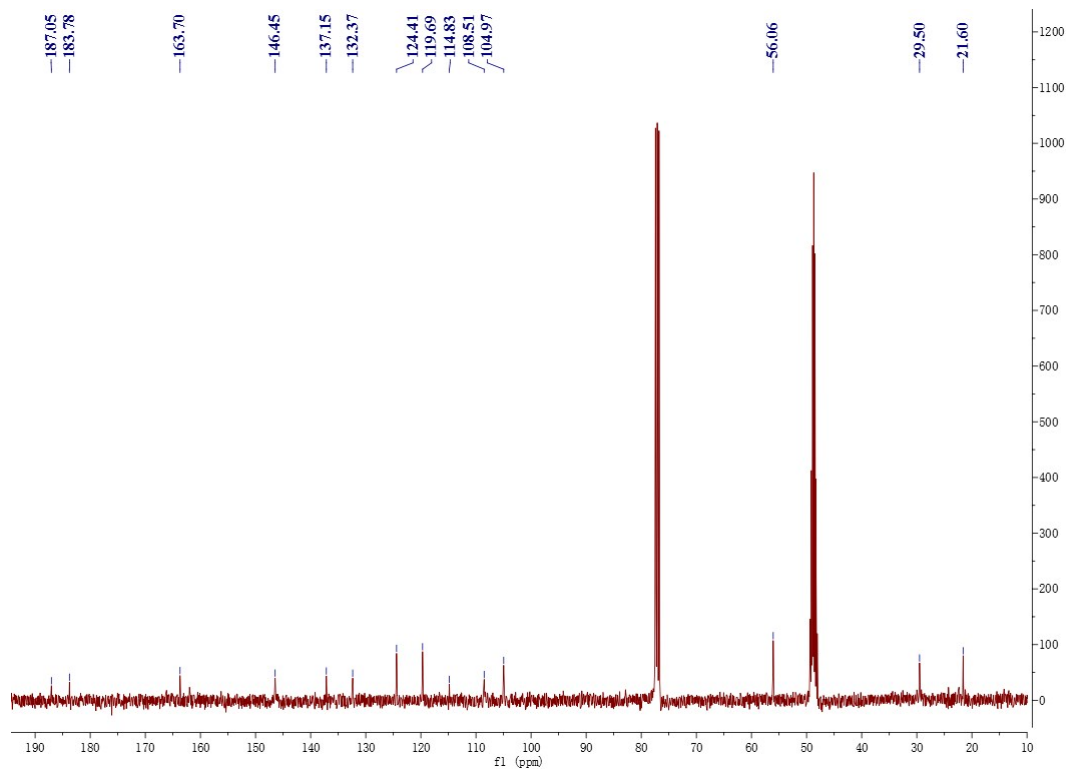

Figure S44.  $^{13}\text{C}$  NMR spectrum of **8** ( $\text{CDCl}_3$ , 100 MHz)

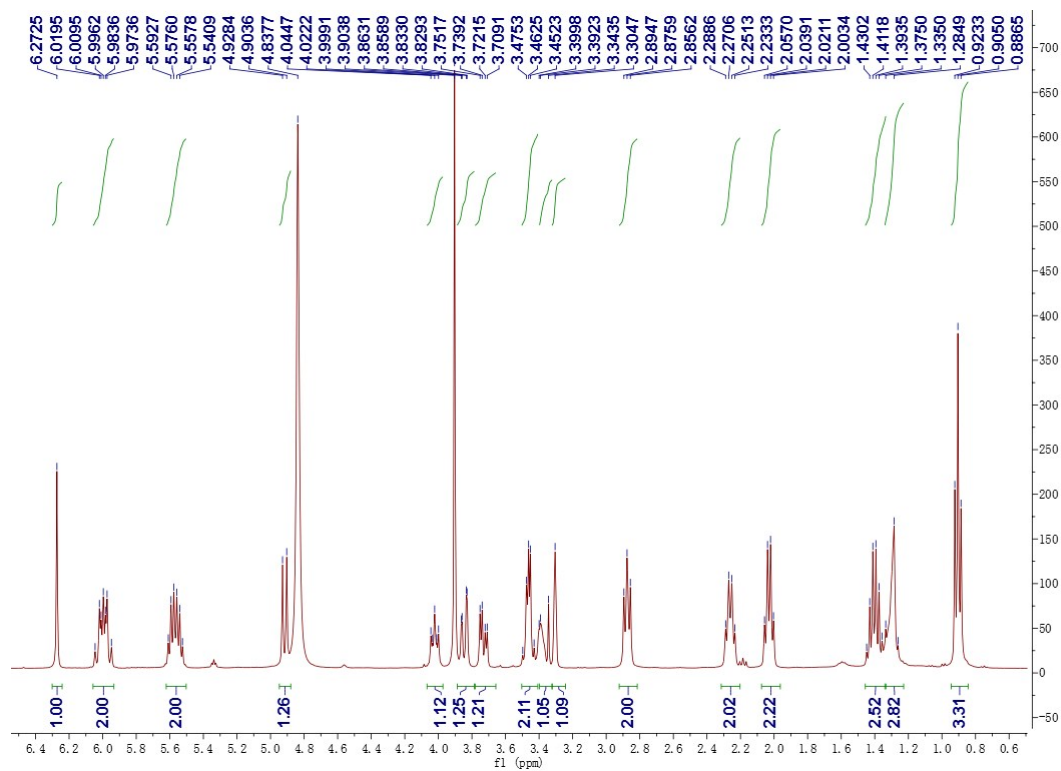

Figure S45.  $^1\text{H}$  NMR spectrum of **9** ( $\text{CD}_3\text{OD}$ , 400 MHz)

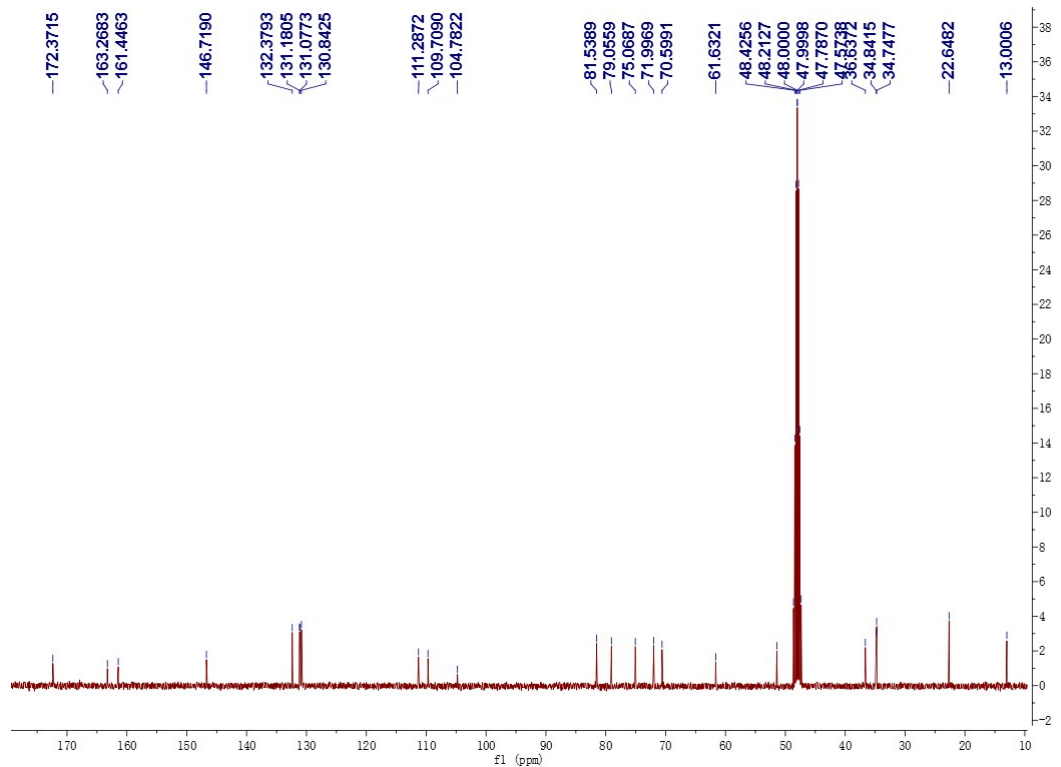

Figure S46.  $^{13}\text{C}$  NMR spectrum of **9** ( $\text{CD}_3\text{OD}$ , 100 MHz)
